# Supplementary material for: Stepwise synthesis and catalysis in C–S cross-coupling of pyridine-functionalized N-heterocyclic carbene nickel(ii) complexes by mechanochemistry
Source: Royal Society of Chemistry journal article supplement (doi:10.1039/d1dt03651c), 2022-01-01

## Supporting Information

# Stepwise synthesis and catalysis in C-S cross-coupling of pyridine-functionalized N-heterocyclic carbene nickel (II) complexes by mechanochemistry

Xiaoxiao Cui, Xiujia Hao, Fang Guo\*

College of Chemistry, Liaoning University, Shenyang 110036, China.

Email: fguo@lnu.edu.cn

### Table of contents

|                                                                                                                        |    |
|------------------------------------------------------------------------------------------------------------------------|----|
| Figure S1. Selected bond lengths (Å) and angles (°) for complexes 1-3 .....                                            | 1  |
| Figure S2. Hydrogen bonding data of complex 1 .....                                                                    | 2  |
| Figure S3. Hydrogen bonding data of complex 1' .....                                                                   | 2  |
| Figure S4. Hydrogen bonding data of complex 2 .....                                                                    | 3  |
| Figure S5. Hydrogen bonding data of complex 3 .....                                                                    | 4  |
| Figure S6. The overlapping of complex 1, 2 and 3 .....                                                                 | 4  |
| Figure S7. PXRD data of complex 1 .....                                                                                | 5  |
| Figure S8. PXRD data of complex 1' .....                                                                               | 5  |
| Figure S9. PXRD data of complex 2 .....                                                                                | 5  |
| Figure S10. PXRD data of complex 3 .....                                                                               | 6  |
| Figure S11. <sup>1</sup> H NMR data of 2-(benzo[d]thiazol-2-ylthio)-1-phenylethanone recrystallized from ethanol ..... | 6  |
| Figure S12. PXRD data of 2-(benzo[d]thiazol-2-ylthio)-1-phenylethanone recrystallized from ethanol .....               | 7  |
| Table S1. Crystal data and structural refinement parameters for complexes 1-3 .....                                    | 7  |
| Table S2. Parallel experiment of catalyst screening .....                                                              | 8  |
| Table S3. Solution-based C-S cross-coupling reaction using complex 3 as catalyst .....                                 | 8  |
| Table S4 Substrate scope for the catalyst complex 3 .....                                                              | 9  |
| Table S5. E-factor for the C-S cross-coupling catalyst system .....                                                    | 9  |
| Table S6. EcoScale penalty points for the C-S cross-coupling catalyst system .....                                     | 9  |
| Table S7. Elemental analysis of complexes 1-3 .....                                                                    | 10 |
| Figure S13. Elemental analysis chromatograms of complexes 1-3 .....                                                    | 10 |
| Analytical Data of Products .....                                                                                      | 11 |
| Spectra of Products .....                                                                                              | 16 |

Figure S1. Selected bond lengths (Å) and angles (°) for complexes 1-3

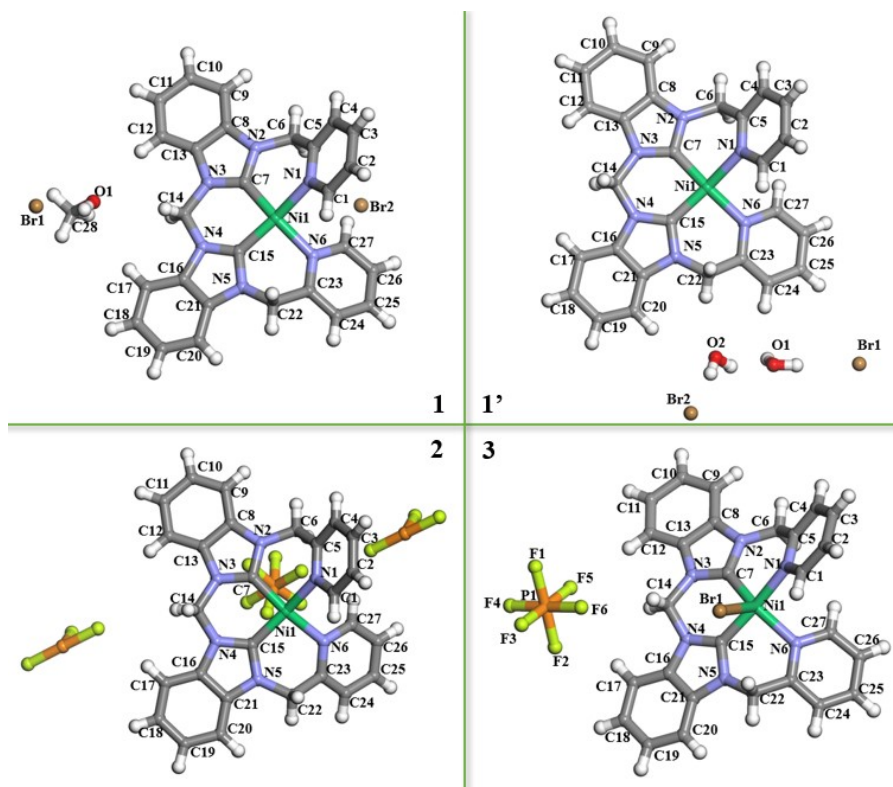

|           | Bond distances (Å) |           | Bond angle (°)      |           |
|-----------|--------------------|-----------|---------------------|-----------|
| <b>1</b>  | N1-Ni1             | 1.970(3)  | $\angle$ N1-Ni1-C7  | 92.22(16) |
|           | C7-Ni1             | 1.851(4)  | $\angle$ C7-Ni1-C15 | 88.97(18) |
|           | C15-Ni1            | 1.851(4)  | $\angle$ C15-Ni1-N6 | 92.36(16) |
|           | N6-Ni1             | 1.952(3)  | $\angle$ N6-Ni1-N1  | 92.34(14) |
| <b>1'</b> | N1-Ni1             | 1.959(5)  | $\angle$ N1-Ni1-C7  | 91.10(2)  |
|           | C7-Ni1             | 1.860(6)  | $\angle$ C7-Ni1-C15 | 88.80(3)  |
|           | C15-Ni1            | 1.865(6)  | $\angle$ C15-Ni1-N6 | 93.40(2)  |
|           | N6-Ni1             | 1.962(5)  | $\angle$ N6-Ni1-N1  | 92.30(2)  |
| <b>2</b>  | N1-Ni1             | 1.929(5)  | $\angle$ N1-Ni1-C7  | 90.20(2)  |
|           | C7-Ni1             | 1.842(6)  | $\angle$ C7-Ni1-C15 | 89.30(3)  |
|           | C15-Ni1            | 1.852(6)  | $\angle$ C15-Ni1-N6 | 93.90(2)  |
|           | N6-Ni1             | 1.938(5)  | $\angle$ N6-Ni1-N1  | 93.80(2)  |
| <b>3</b>  | N1-Ni1             | 1.959(3)  | $\angle$ N1-Ni1-C7  | 91.41(12) |
|           | C7-Ni1             | 1.850(3)  | $\angle$ C7-Ni1-C15 | 88.35(13) |
|           | C15-Ni1            | 1.859(3)  | $\angle$ C15-Ni1-N6 | 92.32(12) |
|           | N6-Ni1             | 2.018(3)  | $\angle$ N6-Ni1-N1  | 91.61(12) |
|           | Br-Ni1             | 2.8536(6) |                     |           |

**Figure S2. Hydrogen bonding data of complex 1**

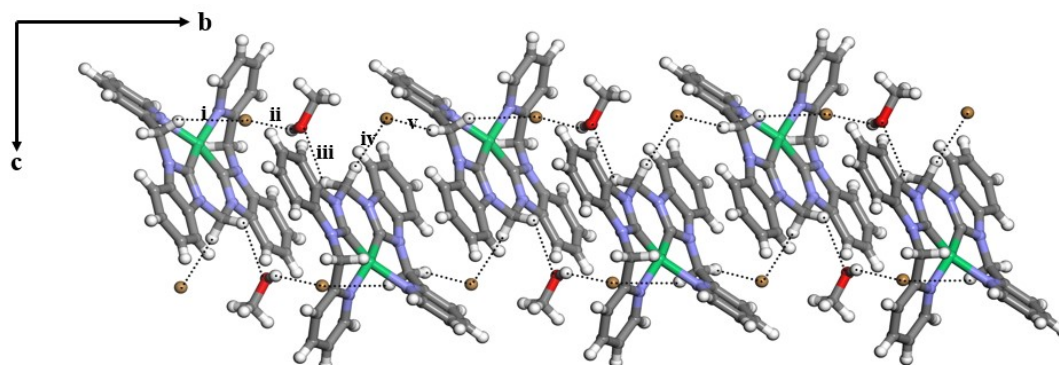

| D-H...A            | D-H (Å) | H...A (Å) | D...A (Å) | D-H...A (°) | Symmetry Code    |
|--------------------|---------|-----------|-----------|-------------|------------------|
| C22-H22B...Br1(i)  | 0.970   | 2.737     | 3.512     | 137.33      | -x+1, -y+1, -z+1 |
| O1-H1A...Br1(ii)   | 0.820   | 2.534     | 3.274     | 150.70      | x, y, z          |
| C14-H14A...O1(iii) | 0.970   | 2.683     | 3.365     | 127.80      | x, y, z          |
| C14-H14B...Br2(iv) | 0.970   | 2.830     | 3.770     | 163.39      | -x+2, -y, -z+1   |
| C22-H22A...Br2(v)  | 0.970   | 2.682     | 3.633     | 166.75      | -x+1, -y+1, -z+1 |

**Figure S3. Hydrogen bonding data of complex 1'**

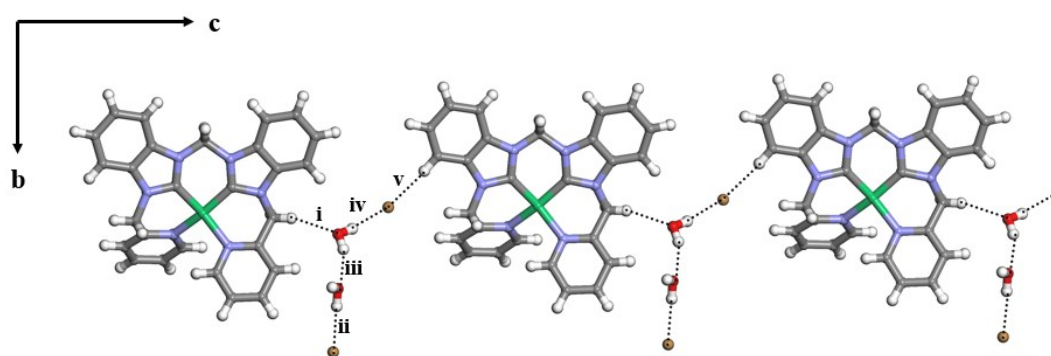

| D-H...A          | D-H (Å) | H...A (Å) | D...A (Å) | D-H...A (°) | Symmetry Code    |
|------------------|---------|-----------|-----------|-------------|------------------|
| C22-H22B...O2(i) | 0.895   | 2.455     | 3.321     | 163.27      | x, y, z          |
| O1-H1B...Br1(ii) | 0.850   | 2.479     | 3.310     | 166.02      | x, y, z          |
| O2-H2B...O1(iii) | 0.850   | 2.007     | 2.801     | 154.98      | -x+1, -y+1, -z+1 |

|                         |       |       |       |        |             |
|-------------------------|-------|-------|-------|--------|-------------|
| O2-H2A $\cdots$ Br2(iv) | 0.849 | 2.472 | 3.315 | 172.01 | x, y, z     |
| C9-H9 $\cdots$ Br2(v)   | 0.930 | 2.931 | 3.747 | 147.17 | x-1, y, z-1 |

**Figure S4. Hydrogen bonding data of complex 2**

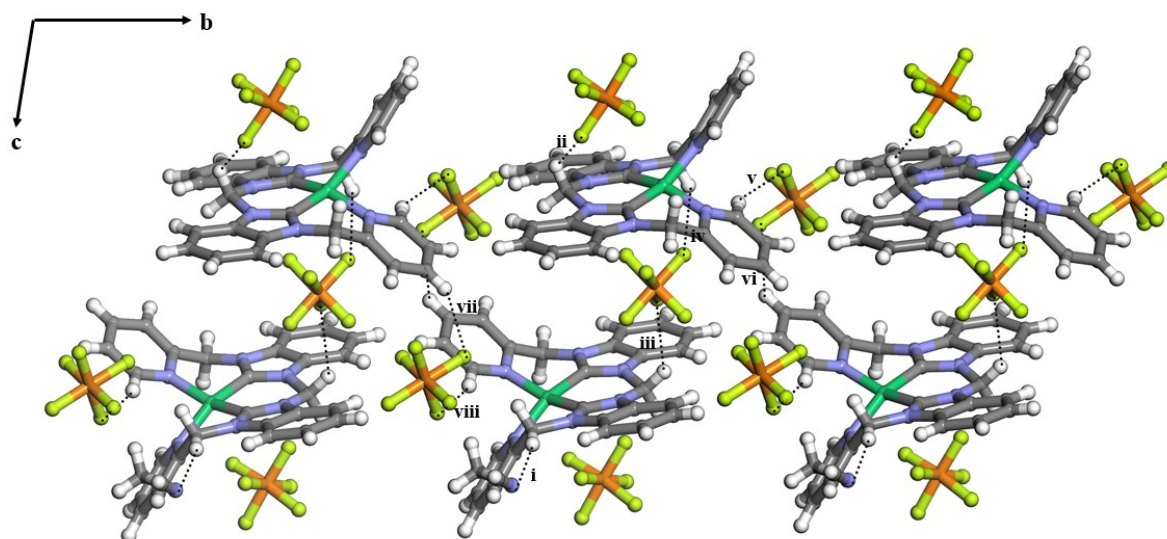

| D-H $\cdots$ A             | D-H (Å) | H $\cdots$ A (Å) | D $\cdots$ A (Å) | D-H $\cdots$ A (°) | Symmetry Code       |
|----------------------------|---------|------------------|------------------|--------------------|---------------------|
| C3-H33B $\cdots$ N13(i)    | 1.090   | 2.462            | 3.288            | 131.61             | x, y, z             |
| C14-H14A $\cdots$ F1(ii)   | 0.970   | 2.526            | 3.161            | 123.03             | -x+1, y, -z+1       |
| C41-H41B $\cdots$ F9(iii)  | 0.971   | 2.580            | 3.263            | 127.47             | x, y, z             |
| C6-H6B $\cdots$ F8(iv)     | 0.970   | 2.459            | 3.305            | 145.59             | x, y, z             |
| C27-H27 $\cdots$ F20(v)    | 0.930   | 2.504            | 3.303            | 144.19             | -x+1, y, -z+2       |
| C52-H52 $\cdots$ F21(vi)   | 0.930   | 2.512            | 3.279            | 139.95             | x, y, z             |
| C25-H25 $\cdots$ F22(vii)  | 0.930   | 2.530            | 3.369            | 150.27             | x, y, z             |
| C54-H54 $\cdots$ F23(viii) | 0.929   | 2.394            | 3.268            | 156.58             | -x+3/2, y-1/2, -z+2 |

**Figure S5. Hydrogen bonding data of complex 3**

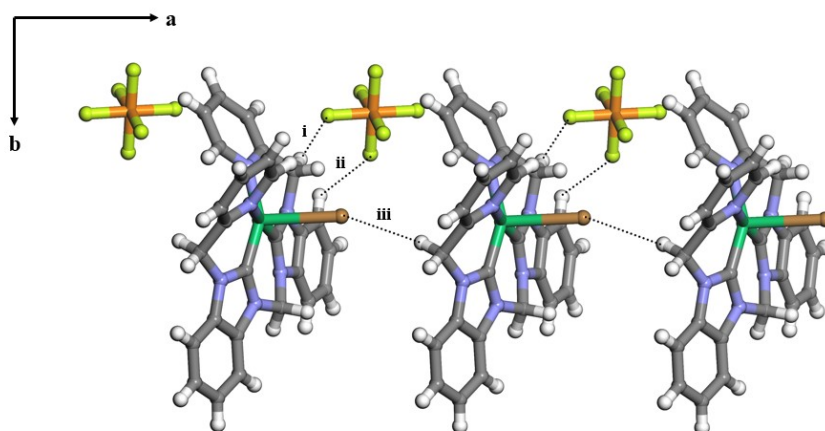

| D-H...A               | D-H (Å) | H...A (Å) | D...A (Å) | D-H...A (°) | Symmetry Code    |
|-----------------------|---------|-----------|-----------|-------------|------------------|
| C22-H22A...F3(i)      | 0.970   | 2.474     | 3.402     | 160.18      | -x+2, -y+1, -z+1 |
| C20-H20...F4(ii) (ii) | 0.930   | 2.455     | 3.199     | 137.04      | -x+2, -y+1, -z+1 |
| C6-H6B...Br1(iii)     | 0.970   | 2.950     | 3.820     | 149.84      | x-1, y, z        |

**Figure S6. The overlapping of complex 1, 2 and 3**

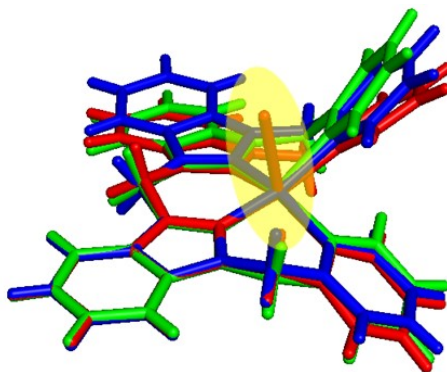

complex 1, blue; complex 2, green; complex 3, red.

**Figure S7. PXRD data of complex 1**

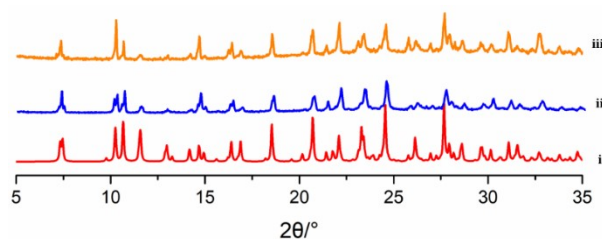

Simulated PXRD pattern from single crystal **1** (i), recrystallization of the grinding product (ii), and grinding product of  $[\text{H}_2\text{L}]\text{Br}_2$  with equal moles of  $\text{Ni}(\text{OAc})_2$  (iii).

**Figure S8. PXRD data of complex 1'**

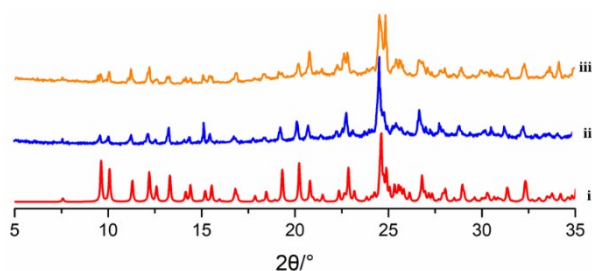

Simulated PXRD pattern from single crystal **1'** (i), recrystallization of the grinding product (ii), and grinding product of  $[\text{H}_2\text{L}]\text{Br}_2$  with equal moles of  $\text{Ni}(\text{OAc})_2$  (iii).

**Figure S9. PXRD data of complex 2**

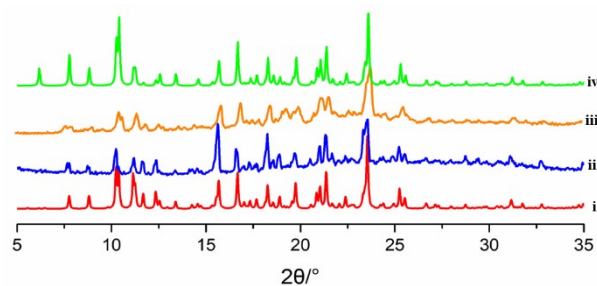

Simulated PXRD pattern of single crystal **2** (i), recrystallization of the grinding product (ii), grinding product of  $[\text{H}_2\text{L}](\text{PF}_6)_2$  with equal moles of  $\text{Ni}(\text{OAc})_2$  (iii), and Crystals reported in the Organometallics 2007, 26, 6636–6642, CSDcode: XIVSEB (iv) (Note: the characteristic peak at  $2\theta = 6^\circ$  is the main difference between complex 2 and reported structure, which reduced the space group from the  $C2/c$  to  $C2$  due to the involvment of solvent.)

**Figure S10. PXRD data of complex 3**

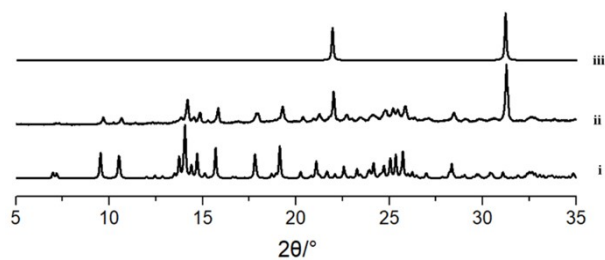

Simulated PXRD pattern from single crystal **3** (i), grinding product of **2** and KBr (ii), simulated PXRD of KPF<sub>6</sub>, ICSD 25576 (iii)

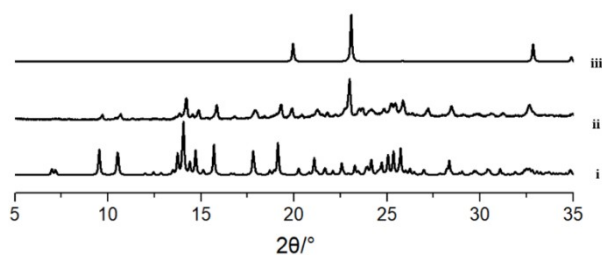

Simulated PXRD pattern from single crystal **3** (i), grinding product of **1/1'** and NH<sub>4</sub>PF<sub>6</sub> (ii), simulated PXRD of NH<sub>4</sub>Br, ICSD 53838 (iii)

**Figure S11. <sup>1</sup>H NMR data of 2-(benzo[d]thiazol-2-ylthio)-1-phenylethanone recrystallized from ethanol**

Synthetic method: A mixture of 2-bromoacetophenone (1 mmol, 0.199 g), 2-mercaptobenzothiazole (1 mmol, 0.167 g), [NiLBr]PF<sub>6</sub> (**3**) (0.018 mmol, 0.0123 mg), and methanol (30 μL) was ground together with a pestle in an agate mortar at room temperature for 30 min. The grinding powder was completely dissolved in an ethanol solution (6 ml), and left for 1-2 days, giving rise to colorless needle crystal, Yield: 92%.

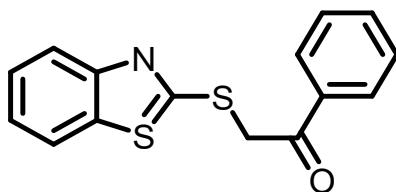

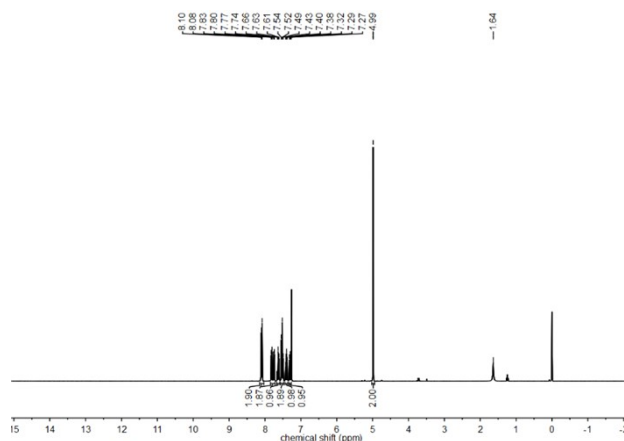

Recrystallized product from ethanol :  $^1\text{H NMR}$  (300 MHz,  $\text{CDCl}_3$ )  $\delta$  = 8.09 (d,  $J$  = 7.1 Hz, 2H), 7.78 (dd,  $J$  = 19.4, 8.0 Hz, 2H), 7.63 (t,  $J$  = 6.8 Hz, 1H), 7.52 (t,  $J$  = 7.5 Hz, 2H), 7.40 (t,  $J$  = 7.1 Hz, 1H), 7.33 – 7.27 (m, 1H), 4.99 (s, 2H).

**Figure S12. PXRD data of 2-(benzo[d]thiazol-2-ylthio)-1-phenylethanone recrystallized from ethanol**

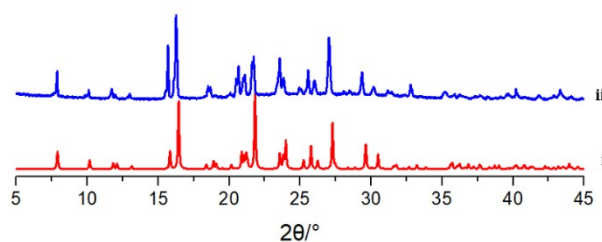

Simulated PXRD pattern from 2-(benzo[d]thiazol-2-ylthio)-1-phenylethanone (CSD code: PUFGED and PUFGED01) (i); Crystals recrystallized from ethanol (ii)

**Table S1. Crystal data and structural refinement parameters for complexes 1-3**

| Crystal           | 1                                                           | 1'                                                            | 2                                                                           | 3                                                            |
|-------------------|-------------------------------------------------------------|---------------------------------------------------------------|-----------------------------------------------------------------------------|--------------------------------------------------------------|
| Empirical formula | $\text{C}_{28}\text{H}_{26}\text{Br}_2\text{N}_6\text{NiO}$ | $\text{C}_{27}\text{H}_{26}\text{Br}_2\text{N}_6\text{NiO}_2$ | $\text{C}_{56}\text{H}_{47}\text{F}_{24}\text{N}_{13}\text{Ni}_2\text{P}_4$ | $\text{C}_{27}\text{H}_{22}\text{BrF}_6\text{N}_6\text{NiP}$ |
| Formula weight    | 681.08                                                      | 685.07                                                        | 1599.36                                                                     | 714.09                                                       |
| Crystal system    | triclinic                                                   | triclinic                                                     | Monoclinic                                                                  | triclinic                                                    |
| Space group       | $P-1$                                                       | $P-1$                                                         | $C2$                                                                        | $P-1$                                                        |
| Z                 | 2                                                           | 2                                                             | 4                                                                           | 2                                                            |
| a (Å)             | 9.1629(7)                                                   | 8.0554(8)                                                     | 31.2054(15)                                                                 | 8.4515(4)                                                    |
| b (Å)             | 11.9336(10)                                                 | 11.9275(12)                                                   | 12.4113(6)                                                                  | 12.4422(6)                                                   |
| c (Å)             | 12.1402(9)                                                  | 14.1463(13)                                                   | 17.2760(9)                                                                  | 12.7049(7)                                                   |



|                                  |             |            |            |             |
|----------------------------------|-------------|------------|------------|-------------|
| $\alpha$ (deg)                   | 91.507(4)   | 91.319(4)  | 90         | 95.299(2)   |
| $\beta$ (deg)                    | 96.448(4)   | 95.998(4)  | 113.261(2) | 91.357(2)   |
| $\gamma$ (deg)                   | 96.523(4)   | 102.033(4) | 90         | 96.987(2)   |
| V (Å <sup>3</sup> )              | 1309.52(18) | 1320.6(2)  | 6147.1(5)  | 1319.57(12) |
| Dx (Mg.cm <sup>-3</sup> )        | 1.727       | 1.723      | 1.728      | 1.797       |
| $\mu$ (mm <sup>-1</sup> )        | 3.827       | 3.798      | 0.842      | 2.384       |
| F (000)                          | 684.0       | 688.0      | 3224.0     | 716         |
| R <sub>int</sub>                 | 0.0627      | 0.0401     | 0.0296     | 0.0464      |
| No.of collected data(unique)     | 21435       | 21263      | 49237      | 22874       |
| No.of data with I>2 $\sigma$ (I) | 3965        | 4881       | 12360      | 4878        |
| No.of parameter                  | 345         | 358        | 895        | 379         |
| S                                | 1.109       | 1.192      | 1.053      | 1.049       |
| R1                               | 0.0685      | 0.0653     | 0.0511     | 0.0474      |
| wR2                              | 0.0974      | 0.1692     | 0.1325     | 0.1113      |

**Table S2. Parallel experiment of catalyst screening**

| Cat.      | First yield (%) | Second yield (%) | Third yield (%) | Average yield (%) |
|-----------|-----------------|------------------|-----------------|-------------------|
| <b>1</b>  | 36              | 38               | 36              | 37                |
| <b>1'</b> | 32              | 33               | 30              | 32                |
| <b>2</b>  | 42              | 40               | 39              | 41                |
| <b>3</b>  | 47              | 45               | 46              | 46                |

Reaction conditions: 2-bromoacetophenone (1 mmol), 2-mercaptobenzothiazole (1 mmol) and 0.6 mol% of Ni-NHC, grinding. Isolated yields after silica gel column chromatography.

**Table S3. Solution-based C-S cross-coupling reaction using complex 3 as catalyst**

| Entry | Time(min) | Solution           | Yield (%) |
|-------|-----------|--------------------|-----------|
| 1     | 20        | CH <sub>3</sub> OH | 18        |
| 2     | 30        | CH <sub>3</sub> OH | 25        |
| 3     | 40        | CH <sub>3</sub> OH | 7         |

Reaction conditions: 2-bromoacetophenone (1 mmol), 2-mercaptobenzothiazole (1 mmol) and 1.8 mol% of complex 3, CH<sub>3</sub>OH (8 mL), stirring. Isolated yields after silica gel column chromatography.

**Table S4 Substrate scope for the catalyst complex 3**

|         |     |     |     |     |
|---------|-----|-----|-----|-----|
| product |     |     |     |     |
| yield   | 73% | 43% | 83% | 25% |
| product |     |     |     |     |
| yield   | 21% | 88% | 37% | 16% |

Reaction conditions: phenacyl bromides (1 mmol), 2-mercaptobenzothiazoles (1 mmol), 1.8 mol% of complex **3**, grinding aid CH<sub>3</sub>OH (30 μL). Isolated yields after silica gel column chromatography

**Table S5. E-factor for the C-S cross-coupling catalyst system**

| Entry | Input Amount                                | Out Amount                                                |
|-------|---------------------------------------------|-----------------------------------------------------------|
| 1     | 2-bromoacetophenone 0.199 g                 | 2-(benzo[d]thiazol-2-ylthio)-1-phenylethanone<br>0.265 g, |
| 2     | 2-mercaptobenzothiazole 0.167 g             | -                                                         |
| 3     | [NiLBr]PF <sub>6</sub> ( <b>3</b> ) 0.013 g | -                                                         |
| 4     | Methanol 0.024 g                            | -                                                         |
|       | Total 0.403 g                               | Total 0.265 g                                             |

$$E\text{-Factor} = \frac{\text{Amount of waste}}{\text{Amount of product}} = \frac{0.403 - 0.265}{0.265} = 0.520 \quad (1.1)$$
**Table S6. EcoScale penalty points for the C-S cross-coupling catalyst system**

| EcoScale penalty points | Factor                      | Penalty |
|-------------------------|-----------------------------|---------|
| 1. Yield                | 93%                         | 3.5     |
| 2. Price                | 2-bromoacetophenone         | 0       |
|                         | 2-mercaptobenzothiazole     | 0       |
|                         | MgSO <sub>4</sub>           | 0       |
| 3. Safety               | 2-mercaptobenzothiazole (N) | 5       |
|                         | petroleum ether (F)         | 5       |
| 4. Technical setup      | agate mortar                | 0       |

|                            |                          |             |
|----------------------------|--------------------------|-------------|
| 5. Temperature /time       | room temperature, 30 min | 0           |
| 6. Workup and purification | classic chromatography   | 10          |
| Penalty points total       |                          | <b>23.5</b> |

$$EcoScale = 100 - \text{sum of individual penalties} = 100 - 23.5 = 76.5$$

**Table S7. Elemental analysis of complexes 1-3**

| Entry     | Anal. calcd |      |       | Found |      |       |
|-----------|-------------|------|-------|-------|------|-------|
|           | C           | H    | N     | C     | H    | N     |
| <b>1</b>  | 49.33       | 3.82 | 12.33 | 49.29 | 3.80 | 12.26 |
| <b>1'</b> | 47.29       | 3.80 | 12.26 | 47.31 | 3.82 | 12.23 |
| <b>2</b>  | 42.02       | 2.94 | 11.38 | 42.06 | 2.91 | 11.41 |
| <b>3</b>  | 45.37       | 3.08 | 11.76 | 45.38 | 3.11 | 11.71 |

**Figure S13. Elemental analysis chromatograms of complexes 1-3**

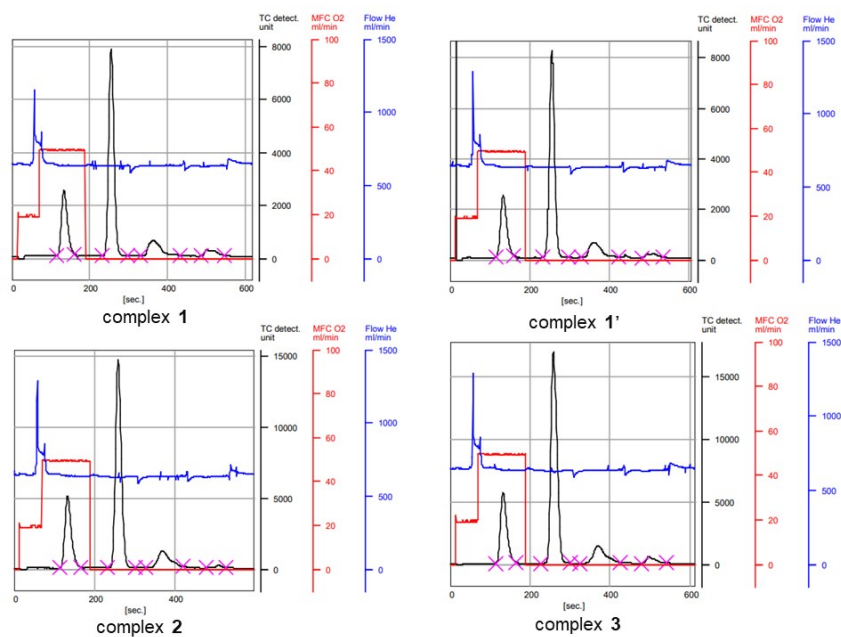

## Analytical Data of Products

$[\text{H}_2\text{L}]\text{Br}_2$

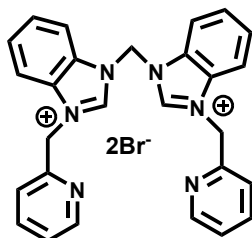

$^1\text{H NMR}$  (300 MHz, DMSO)  $\delta$  = 10.65 (s, 2H), 8.46 (d,  $J$  = 4.5 Hz, 2H), 8.40 (d,  $J$  = 8.3 Hz, 2H), 8.04 (d,  $J$  = 8.2 Hz, 2H), 7.92 (t,  $J$  = 7.7 Hz, 2H), 7.74 (dq,  $J$  = 14.8, 7.5 Hz, 6H), 7.60 (s, 2H), 7.44 – 7.35 (m, 2H), 6.05 (s, 4H).

$[\text{H}_2\text{L}](\text{PF}_6)_2$

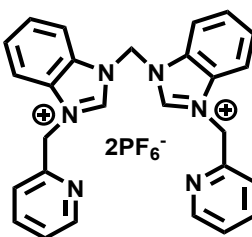

$^1\text{H NMR}$  (300 MHz, DMSO)  $\delta$  = 10.51 (s, 2H), 8.47 (d,  $J$  = 4.5 Hz, 2H), 8.36 (d,  $J$  = 8.3 Hz, 2H), 8.05 (d,  $J$  = 8.2 Hz, 2H), 7.93 (t,  $J$  = 7.7 Hz, 2H), 7.80 (t,  $J$  = 7.7 Hz, 2H), 7.72 (dt,  $J$  = 7.4, 3.6 Hz, 4H), 7.53 (s, 2H), 7.44 – 7.36 (m, 2H), 6.02 (s, 4H)

$[\text{NiL}]\text{Br}_2 \cdot \text{CH}_3\text{OH}$  (1)

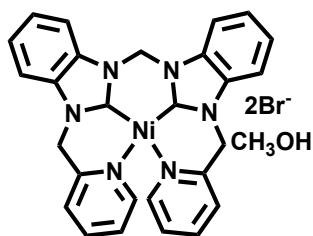

$^1\text{H NMR}$  (400 MHz, DMSO)  $\delta$  = 8.79 (d,  $J$  = 5.9 Hz, 2H), 8.27 (t,  $J$  = 7.0 Hz, 2H), 8.20 – 8.10 (m, 4H), 8.02 (d,  $J$  = 7.8 Hz, 2H), 7.71 – 7.63 (m, 4H), 7.60 (t,  $J$  = 6.5 Hz, 2H), 6.95 (s, 2H), 6.18 (s, 4H).

$[\text{NiL}]\text{Br}_2 \cdot 2\text{H}_2\text{O}$  (1')

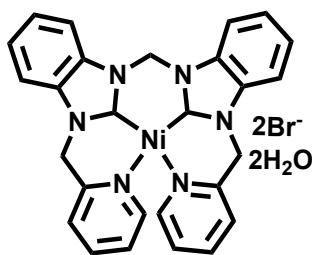

$^1\text{H NMR}$  (400 MHz, DMSO)  $\delta$  = 8.78 (d,  $J$  = 5.2 Hz, 2H), 8.25 (td,  $J$  = 7.7, 1.4 Hz, 2H), 8.20 – 8.08 (m, 4H), 8.01 (d,  $J$  = 7.5 Hz, 2H), 7.70 – 7.62 (m, 4H), 7.61 – 7.54 (m, 2H), 6.94 (s, 2H), 6.17 (s, 4H).

[NiL](PF<sub>6</sub>)<sub>2</sub>·0.5CH<sub>3</sub>CN (2)

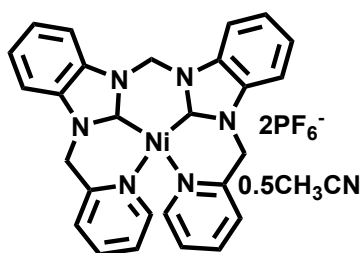

<sup>1</sup>H NMR (400 MHz, DMSO) δ = 8.74 (d, *J* = 5.8 Hz, 2H), 8.35 (td, *J* = 7.7, 1.5 Hz, 2H), 8.22 (dd, *J* = 6.1, 3.0 Hz, 2H), 8.17 (d, *J* = 2.1 Hz, 2H), 8.07 (d, *J* = 7.5 Hz, 2H), 7.79 – 7.72 (m, 4H), 7.68 (t, *J* = 6.7 Hz, 2H), 7.08 (s, 2H), 6.23 (s, 4H).

[NiLBr]PF<sub>6</sub> (3).

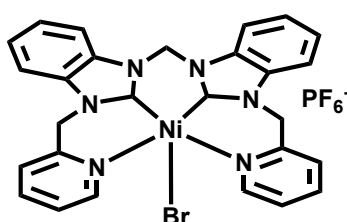

<sup>1</sup>H NMR (400 MHz, DMSO) δ = 8.78 (d, *J* = 5.6 Hz, 2H), 8.26 (t, *J* = 7.7 Hz, 2H), 8.21 – 8.07 (m, 4H), 8.02 (d, *J* = 7.6 Hz, 2H), 7.74 – 7.62 (m, 4H), 7.60 (t, *J* = 6.5 Hz, 2H), 6.95 (s, 2H), 6.17 (s, 4H).

**2-(benzo[d]thiazol-2-ylthio)-1-phenylethanone:** White solid; yield: 93%.

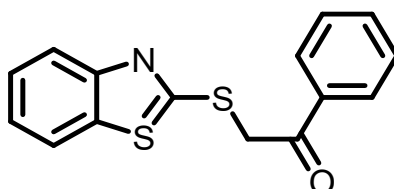

<sup>1</sup>H NMR (300 MHz, CDCl<sub>3</sub>) δ = 8.09 (d, *J* = 7.5 Hz, 2H), 7.78 (d, *J* = 19.7, 7.8 Hz, 2H), 7.63 (t, *J* = 7.4 Hz, 1H), 7.52 (t, *J* = 7.7 Hz, 2H), 7.40 (t, *J* = 7.4 Hz, 1H), 7.33 – 7.24 (m, 1H), 4.98 (s, 2H). <sup>13</sup>C NMR (75 MHz, CDCl<sub>3</sub>) δ = 192.75 (s), 165.10 (s), 152.69 (s), 135.31 (d, *J* = 4.6 Hz), 133.69 (s), 129.06 (s), 128.53 (d, *J* = 18.2 Hz), 125.89 (s), 124.25 (s), 121.33 (s), 120.94 (s), 40.92 (s). IR (KBr): ν = 1597.43 cm<sup>-1</sup> (C=O).

**2-(benzo[d]thiazol-2-ylthio)-1-(4-fluorophenyl)ethanone :** White solid; yield: 83%.

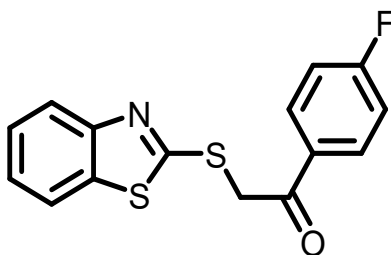

<sup>1</sup>H NMR (300 MHz, CDCl<sub>3</sub>) δ = 8.12 (dd, *J* = 8.8, 5.4 Hz, 2H), 7.78 (dd, *J* = 17.0, 8.0 Hz, 2H), 7.40 (t, *J* = 7.2 Hz, 1H), 7.34 – 7.24 (m, 1H), 7.18 (t, *J* = 8.6 Hz, 2H), 4.93 (s, 2H). <sup>13</sup>C NMR (100 MHz, CDCl<sub>3</sub>) δ = 190.48 (s), 165.24 (d, *J* = 235 Hz), 164.07 (s), 151.73 (s), 134.49 (s),

130.94 (d,  $J = 3.1$  Hz), 130.32 (d,  $J = 9.5$  Hz), 125.06 (s), 123.46 (s), 120.45 (s), 120.09 (s), 114.96 (d,  $J = 22.2$  Hz), 39.61 (s). **IR** (KBr):  $\nu = 1597.33$   $\text{cm}^{-1}$  (C=O).

**2-(benzo[d]thiazol-2-ylthio)-1-(4-chlorophenyl)ethanone** : White solid; yield: 25%.

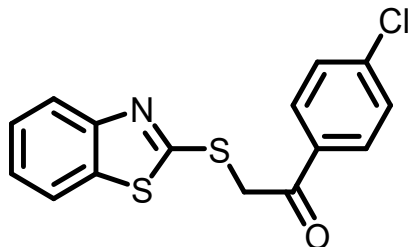

**$^1\text{H NMR}$**  (300 MHz, DMSO)  $\delta = 8.10$  (d,  $J = 8.6$  Hz, 2H), 8.00 (d,  $J = 7.9$  Hz, 1H), 7.74 (d,  $J = 7.9$  Hz, 1H), 7.66 (d,  $J = 8.6$  Hz, 2H), 7.43 (t,  $J = 7.6$  Hz, 1H), 7.39 – 7.30 (m, 1H), 5.14 (s, 2H).  **$^{13}\text{C NMR}$**  (75 MHz, DMSO)  $\delta = 192.21$  (s), 165.79 (s), 152.51 (s), 138.83 (s), 134.86 (s), 134.21 (s), 130.49 (s), 129.09 (s), 126.46 (s), 124.61 (s), 121.95 (s), 121.14 (s), 40.93 (s). **IR** (KBr):  $\nu = 1598.16$   $\text{cm}^{-1}$  (C=O).

**2-(benzo[d]thiazol-2-ylthio)-1-(4-bromophenyl)ethanone** : White solid; yield: 21%.

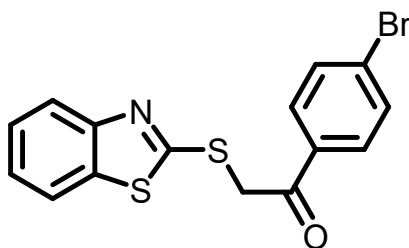

**$^1\text{H NMR}$**  (300 MHz,  $\text{CDCl}_3$ )  $\delta = 7.96$  (d,  $J = 8.6$  Hz, 2H), 7.78 (dd,  $J = 13.4, 8.0$  Hz, 2H), 7.66 (d,  $J = 8.6$  Hz, 2H), 7.40 (t,  $J = 7.7$  Hz, 1H), 7.29 (t,  $J = 12.3$  Hz, 2H), 4.91 (s, 2H).  **$^{13}\text{C NMR}$**  (75 MHz,  $\text{CDCl}_3$ )  $\delta = 192.16$  (s), 164.88 (s), 152.69 (s), 135.49 (s), 134.20 (s), 132.11 (s), 130.07 (s), 129.12 (s), 126.06 (s), 124.46 (s), 121.44 (s), 121.10 (s), 40.49 (s). **IR** (KBr):  $\nu = 1598.25$   $\text{cm}^{-1}$  (C=O).

**2-(benzo[d]thiazol-2-ylthio)-1-p-tolyethanone** : yellow solid; yield: 88%.

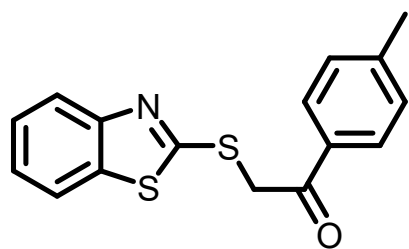

**$^1\text{H NMR}$**  (300 MHz,  $\text{CDCl}_3$ )  $\delta = 7.97$  (d,  $J = 8.2$  Hz, 2H), 7.82 (d,  $J = 8.0$  Hz, 1H), 7.74 (d,  $J = 8.0$  Hz, 1H), 7.39 (t,  $J = 8.2$  Hz, 1H), 7.28 (t,  $J = 8.4$  Hz, 3H), 4.95 (s, 2H), 2.43 (s, 3H).  **$^{13}\text{C NMR}$**  (75 MHz,  $\text{CDCl}_3$ )  $\delta = 192.28$  (s), 165.26 (s), 152.72 (s), 144.69 (s), 135.31 (s), 132.73 (s), 129.32 (s), 128.52 (s), 125.86 (s), 124.75 (s), 124.21 (s), 121.30 (s), 120.91 (s), 40.94 (s), 21.62 (s). **IR** (KBr):  $\nu = 1599.15$   $\text{cm}^{-1}$  (C=O).

**2-(benzo[d]thiazol-2-ylthio)-1-(4-methoxyphenyl)ethanone** : White solid; yield: 37%.

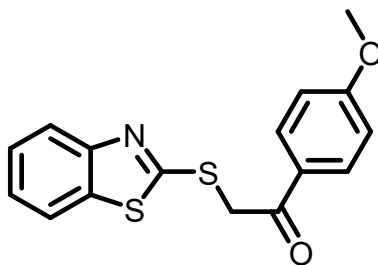

$^1\text{H NMR}$  (300 MHz, DMSO)  $\delta$  = 8.04 (d,  $J$  = 20.8, 8.4 Hz, 3H), 7.78 (d,  $J$  = 8.0 Hz, 1H), 7.40 (dt,  $J$  = 15.8, 7.3 Hz, 2H), 7.11 (d,  $J$  = 8.8 Hz, 2H), 5.12 (s, 2H), 3.88 (s, 3H).  $^{13}\text{C NMR}$  (75 MHz, DMSO)  $\delta$  = 191.20 (s), 166.12 (s), 163.72 (s), 152.61 (s), 134.83 (s), 131.36 (s), 130.98 (s), 128.27 (s), 126.42 (s), 124.53 (s), 121.88 (s), 121.13 (s), 114.17 (s), 55.73 (s), 40.83 (s). **IR** (KBr):  $\nu$  = 1595.30  $\text{cm}^{-1}$  (C=O).

**1-([1,1'-biphenyl]-4-yl)-2-(benzo[d]thiazol-2-ylthio)ethanone**: White solid; yield: 16%.

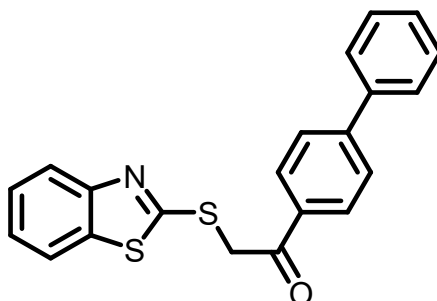

$^1\text{H NMR}$  (300 MHz,  $\text{CDCl}_3$ )  $\delta$  = 8.15 (d,  $J$  = 8.4 Hz, 2H), 7.83 (d,  $J$  = 7.8 Hz, 1H), 7.74 (t,  $J$  = 7.6 Hz, 3H), 7.64 (d,  $J$  = 7.9 Hz, 2H), 7.44 (dt,  $J$  = 18.7, 7.6 Hz, 4H), 7.28 (dd,  $J$  = 13.4, 6.3 Hz, 1H), 5.00 (s, 2H).  $^{13}\text{C NMR}$  (75 MHz,  $\text{CDCl}_3$ )  $\delta$  = 192.50 (s), 165.30 (s), 152.75 (s), 146.50 (s), 139.59 (s), 135.45 (s), 134.08 (s), 129.09 (d,  $J$  = 16.3 Hz), 128.41 (s), 127.43 (t,  $J$  = 13.4 Hz), 126.04 (s), 124.29 (d,  $J$  = 17.5 Hz), 121.45 (s), 121.07 (s), 40.98 (s). **IR** (KBr):  $\nu$  = 1600.00  $\text{cm}^{-1}$  (C=O).

**2-(4-methylbenzo[d]thiazol-2-ylthio)-1-phenylethanone**: White solid; yield: 73%.

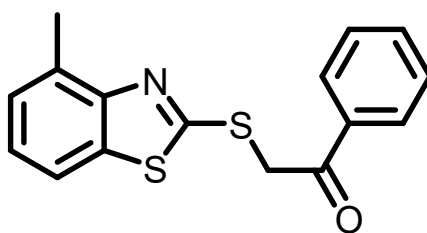

$^1\text{H NMR}$  (300 MHz, DMSO)  $\delta$  = 8.10 (d,  $J$  = 7.2 Hz, 2H), 7.84 – 7.74 (m, 1H), 7.70 (t,  $J$  = 7.4 Hz, 1H), 7.58 (t,  $J$  = 7.5 Hz, 2H), 7.20 (d,  $J$  = 9.4 Hz, 2H), 5.08 (s, 2H), 3.33 (s, 3H).  $^{13}\text{C NMR}$  (75 MHz, DMSO)  $\delta$  = 193.33 (s), 164.48 (s), 151.65 (s), 135.82 (s), 134.70 (s), 133.78 (s), 130.61 (s), 128.91 (s), 128.49 (s), 126.82 (s), 124.52 (s), 119.24 (s), 17.65 (s). **IR** (KBr):  $\nu$  = 1595.42  $\text{cm}^{-1}$  (C=O).

**2-(5-bromobenzo[d]thiazol-2-ylthio)-1-phenylethanone**: White solid; yield: 43%.

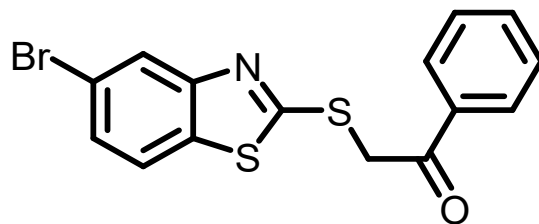

**<sup>1</sup>H NMR** (300 MHz, DMSO)  $\delta$  = 8.30 (d,  $J$  = 2.0 Hz, 1H), 8.09 (d,  $J$  = 7.2 Hz, 2H), 7.71 (dd,  $J$  = 12.7, 7.5 Hz, 2H), 7.60 (t,  $J$  = 7.6 Hz, 3H), 5.19 (s, 2H). **<sup>13</sup>C NMR** (75 MHz, DMSO)  $\delta$  = 192.85 (s), 167.41 (s), 151.64 (s), 136.85 (s), 135.40 (s), 133.95 (s), 129.51 (s), 128.97 (s), 128.55 (s), 124.45 (s), 122.52 (s), 116.99 (s), 41.21 (s). **IR** (KBr):  $\nu$  = 1598.19  $\text{cm}^{-1}$  (C=O).



## Spectra of Products

Figure S1.  $^1\text{H}$  NMR spectrum of  $[\text{H}_2\text{L}]\text{Br}_2$

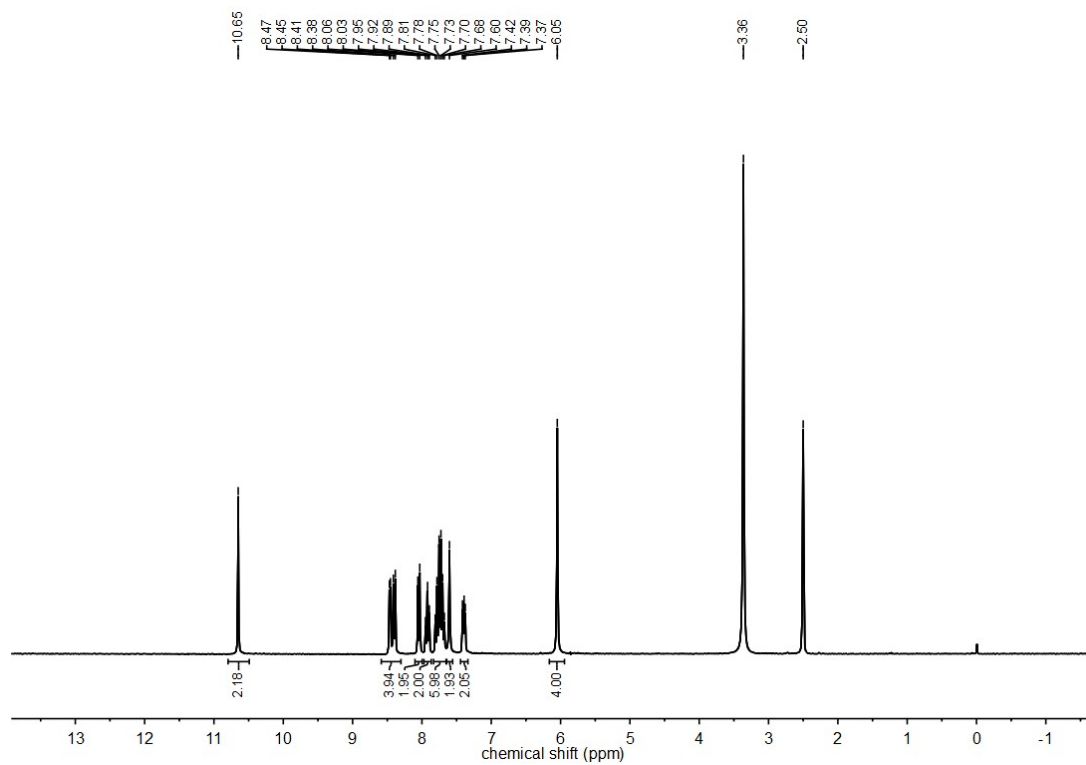

Figure S2.  $^1\text{H}$  NMR spectrum of  $[\text{H}_2\text{L}](\text{PF}_6)_2$

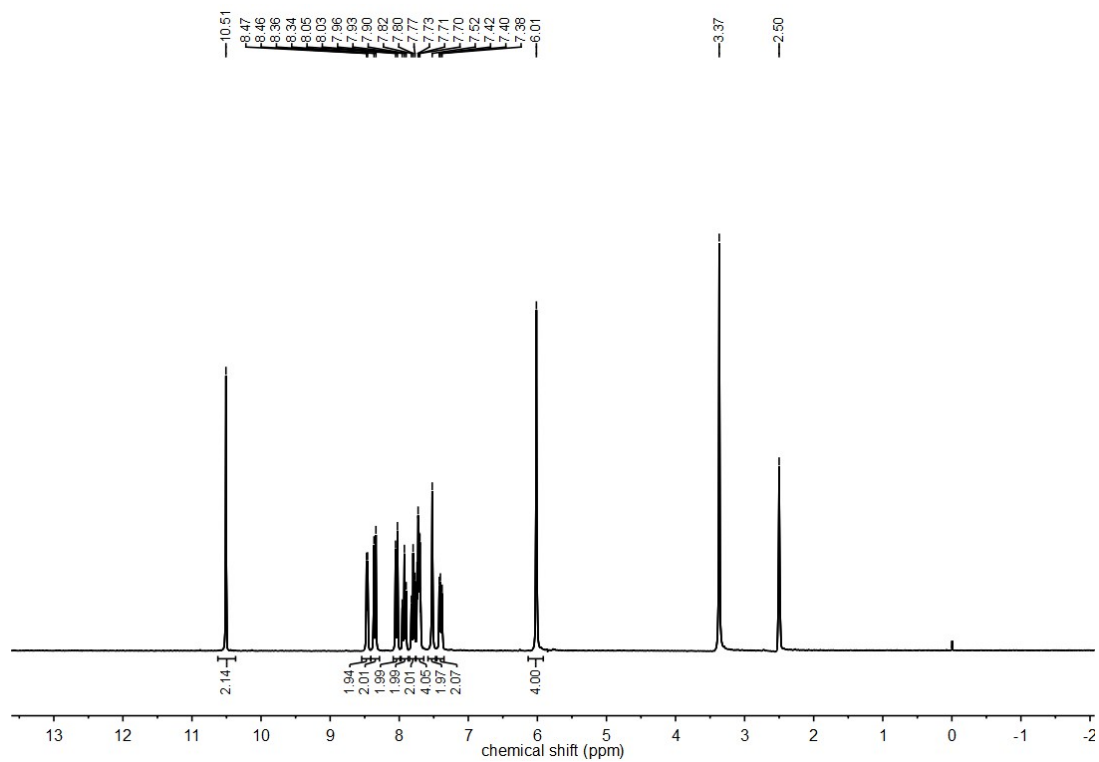

Figure S3.  $^1\text{H}$  NMR spectrum of  $[\text{NiL}]\text{Br}_2 \cdot \text{CH}_3\text{OH}$  (1)

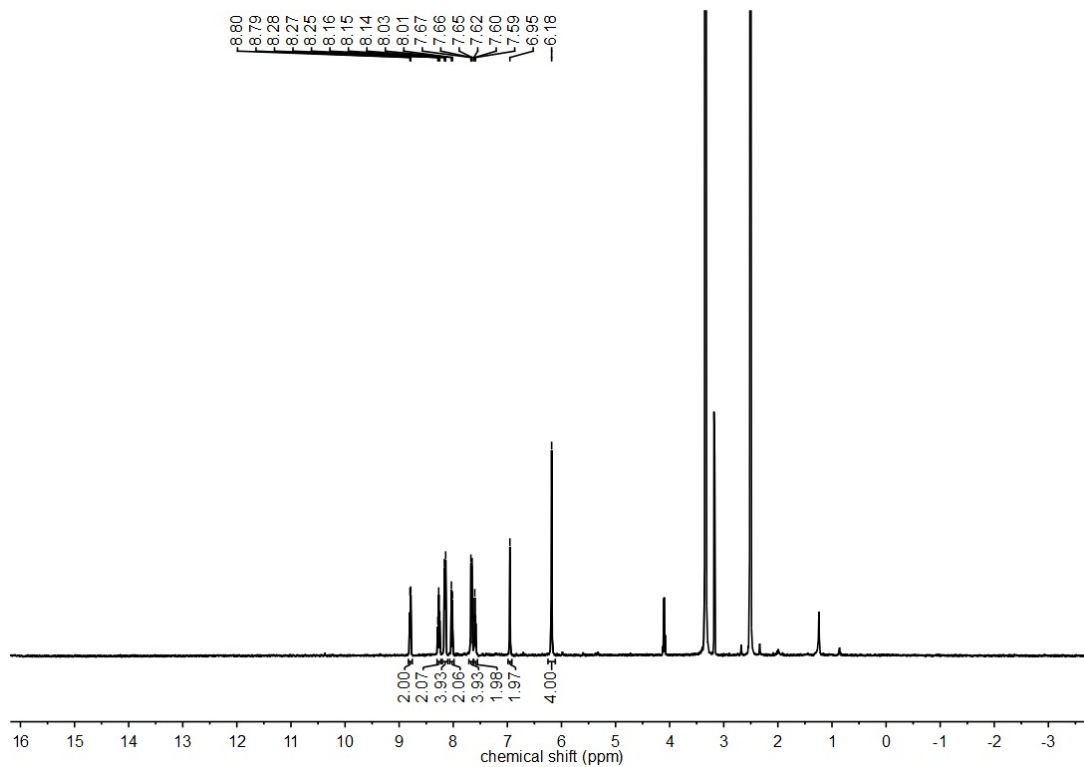

Figure S4.  $^1\text{H}$  NMR spectrum of  $[\text{NiL}]\text{Br}_2 \cdot 2\text{H}_2\text{O}$  (1')

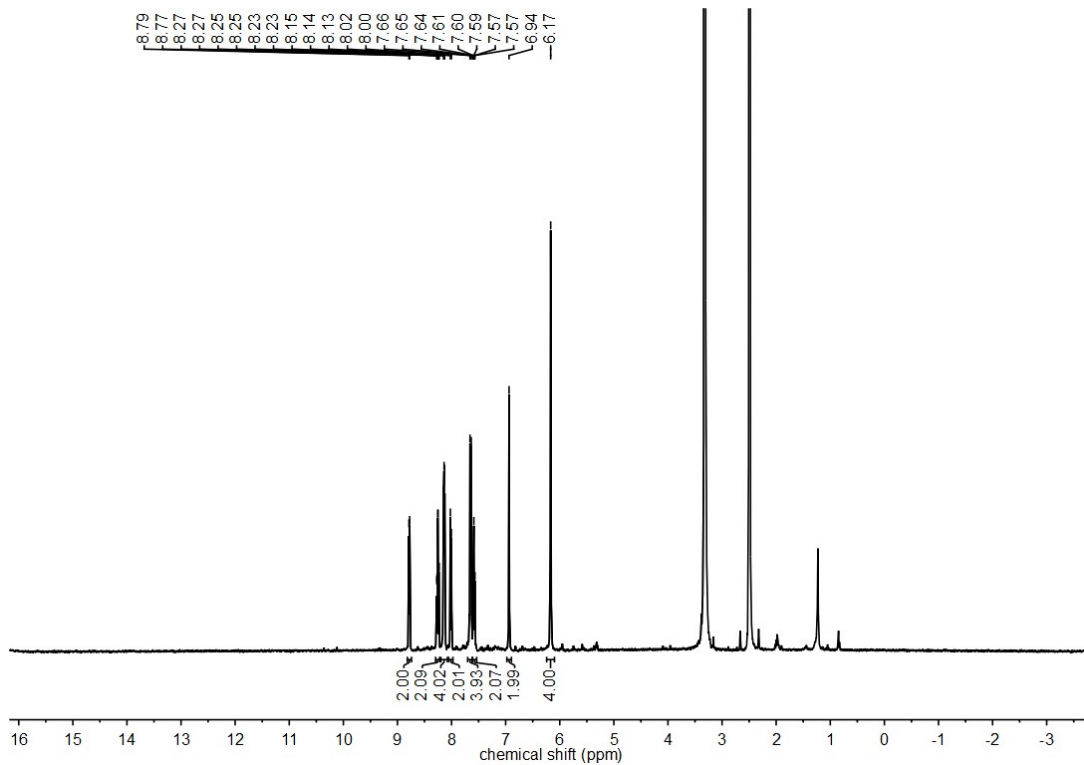

Figure S5.  $^1\text{H}$  NMR spectrum of  $[\text{NiL}](\text{PF}_6)_2 \cdot 0.5\text{CH}_3\text{CN}$  (2)

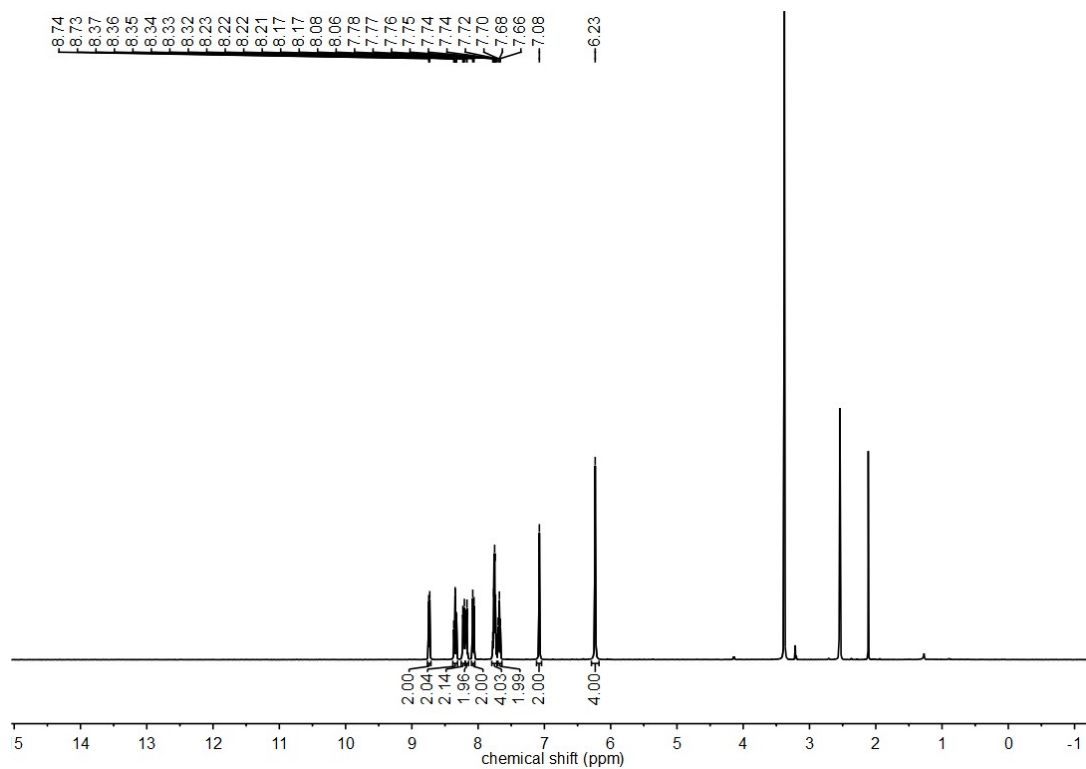

Figure S6.  $^1\text{H}$  NMR spectrum of  $[\text{NiLBr}]\text{PF}_6$  (3)

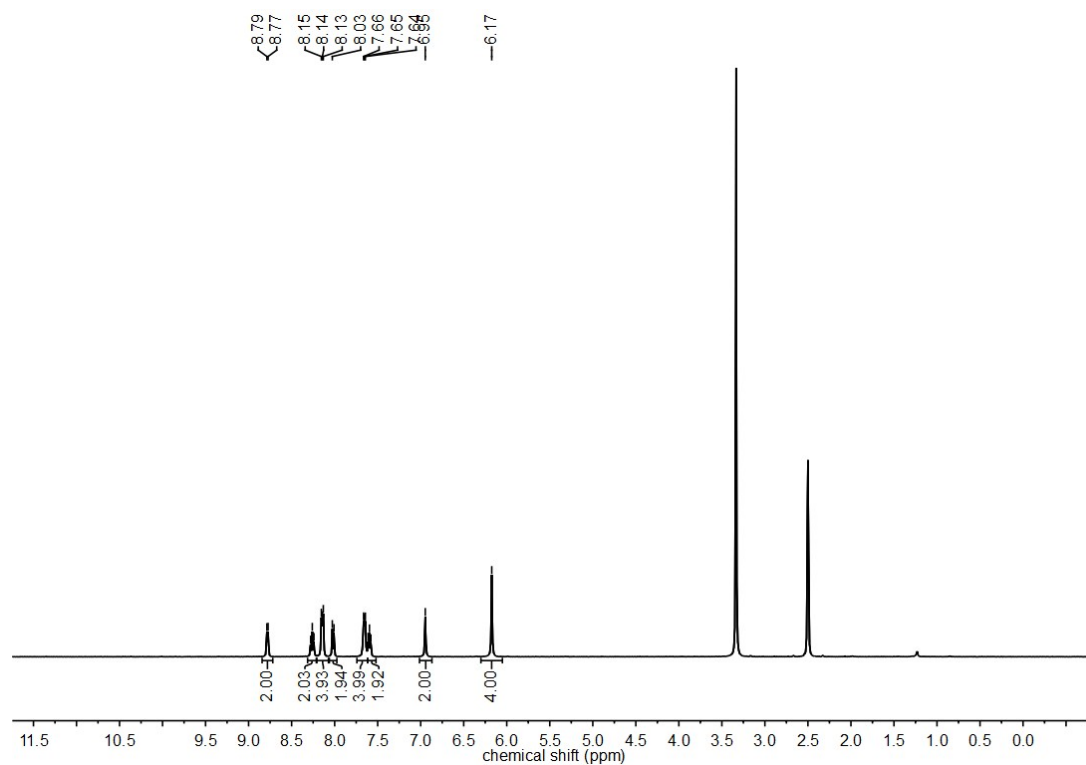

Figure S7.  $^1\text{H}$  NMR and  $^{13}\text{C}$  NMR spectrum of 2-(benzo[d]thiazol-2-ylthio)-1-phenylethanone

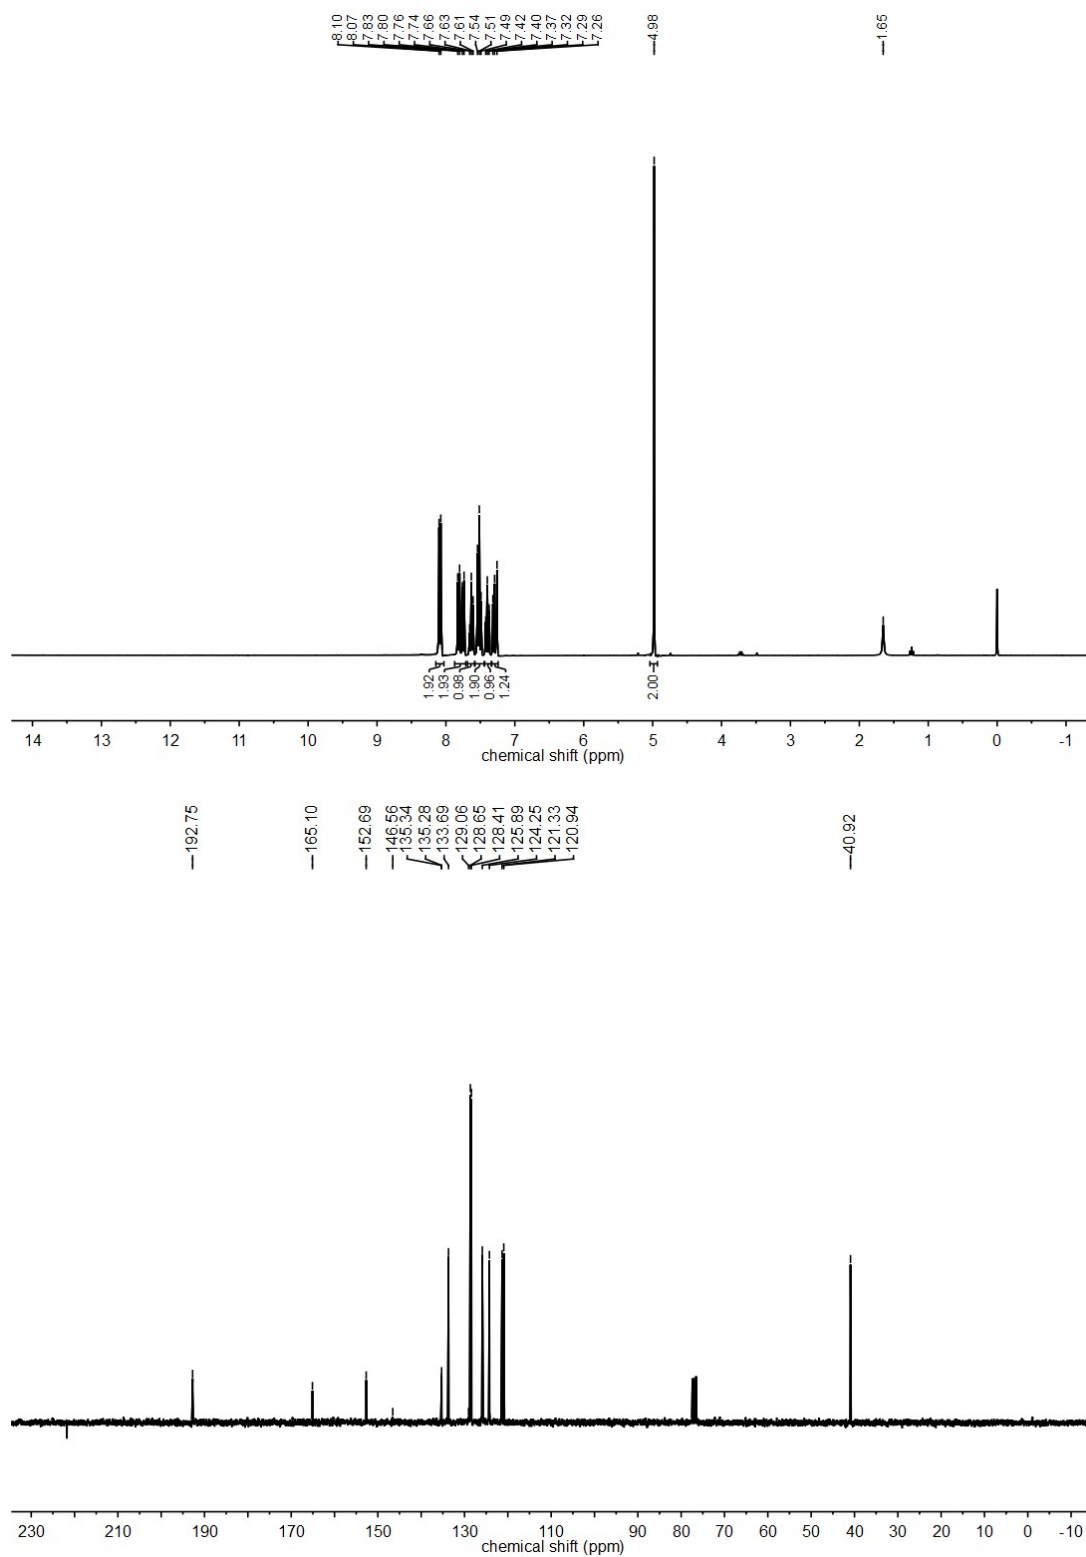

Figure S8. <sup>1</sup>H NMR and <sup>13</sup>C NMR spectrum of 2-(benzo[d]thiazol-2-ylthio)-1-(4-fluorophenyl)ethanone

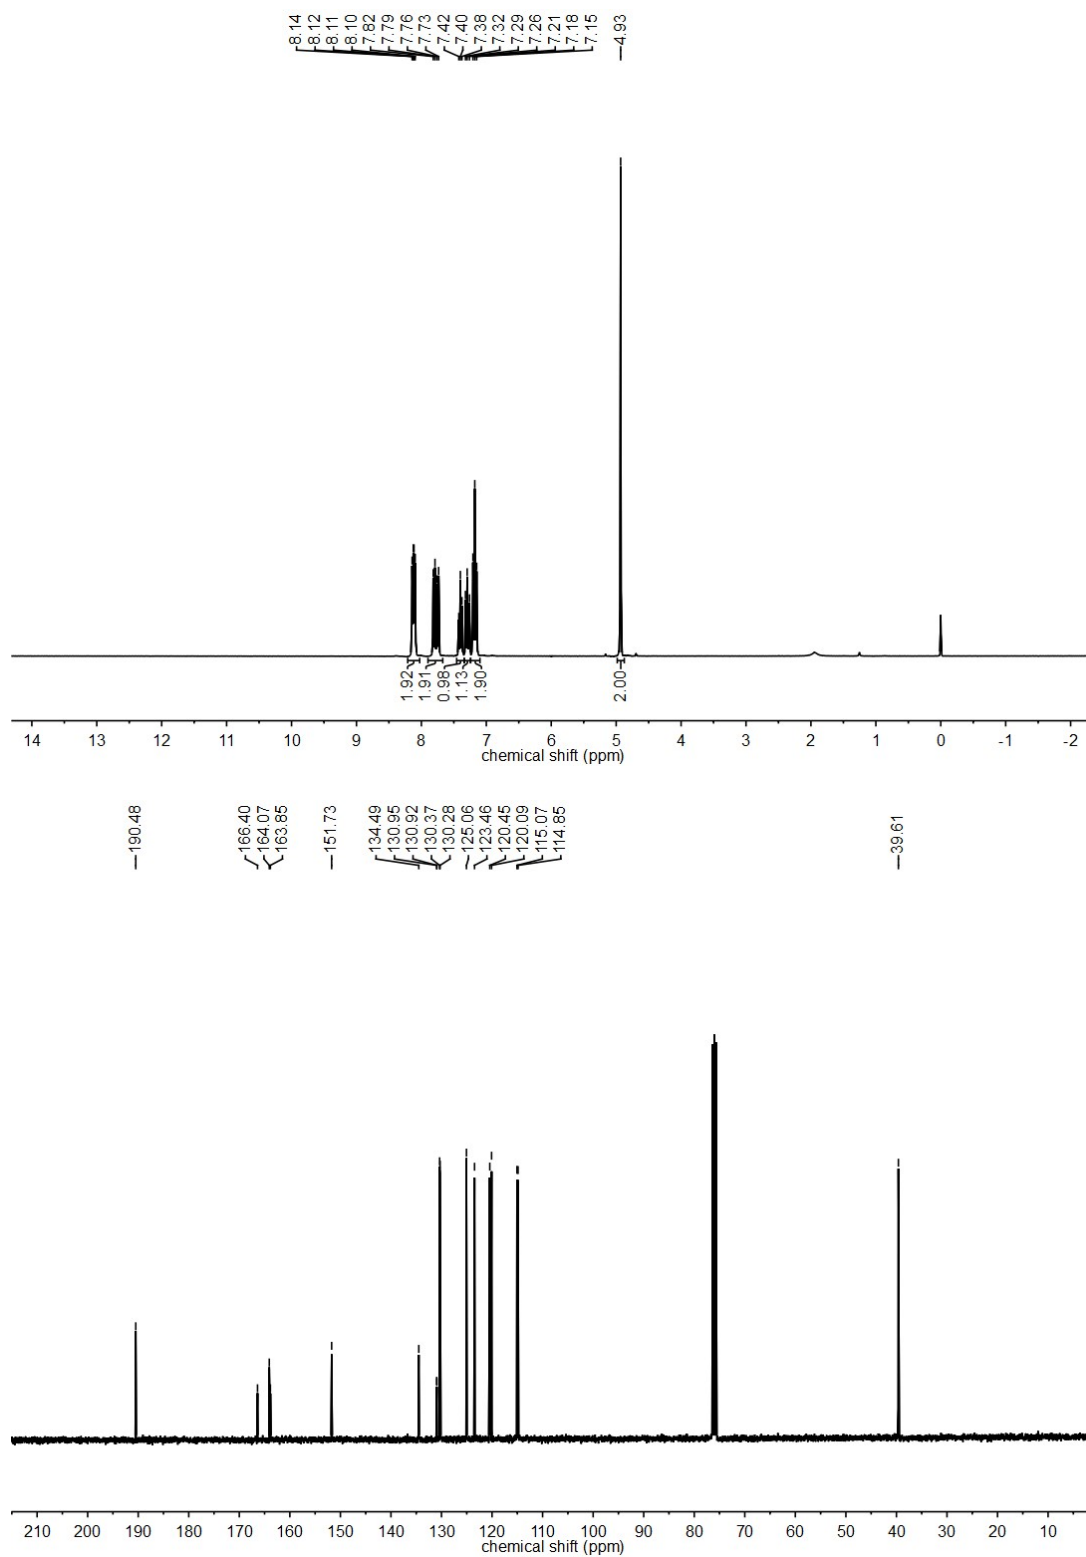

Figure S9.  $^1\text{H}$  NMR and  $^{13}\text{C}$  NMR spectrum of 2-(benzo[d]thiazol-2-ylthio)-1-(4-chlorophenyl)ethenone

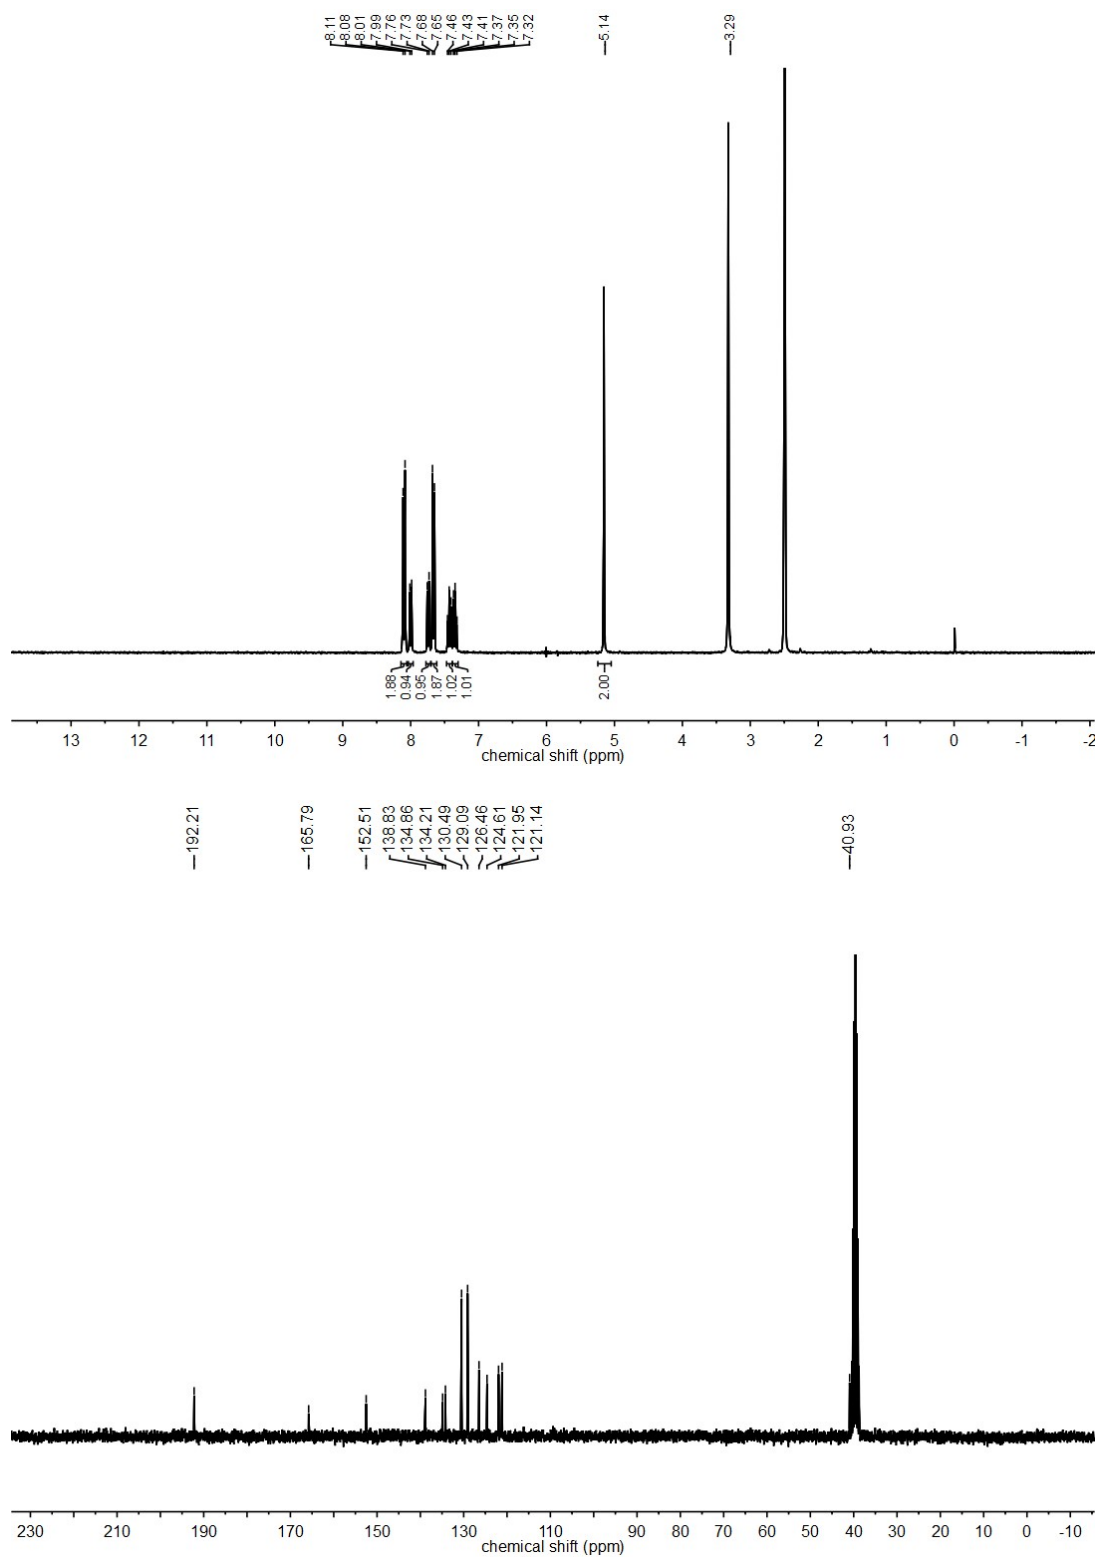

Figure S10. <sup>1</sup>H NMR and <sup>13</sup>C NMR spectrum of 2-(benzo[d]thiazol-2-ylthio)-1-(4-bromophenyl)ethanone

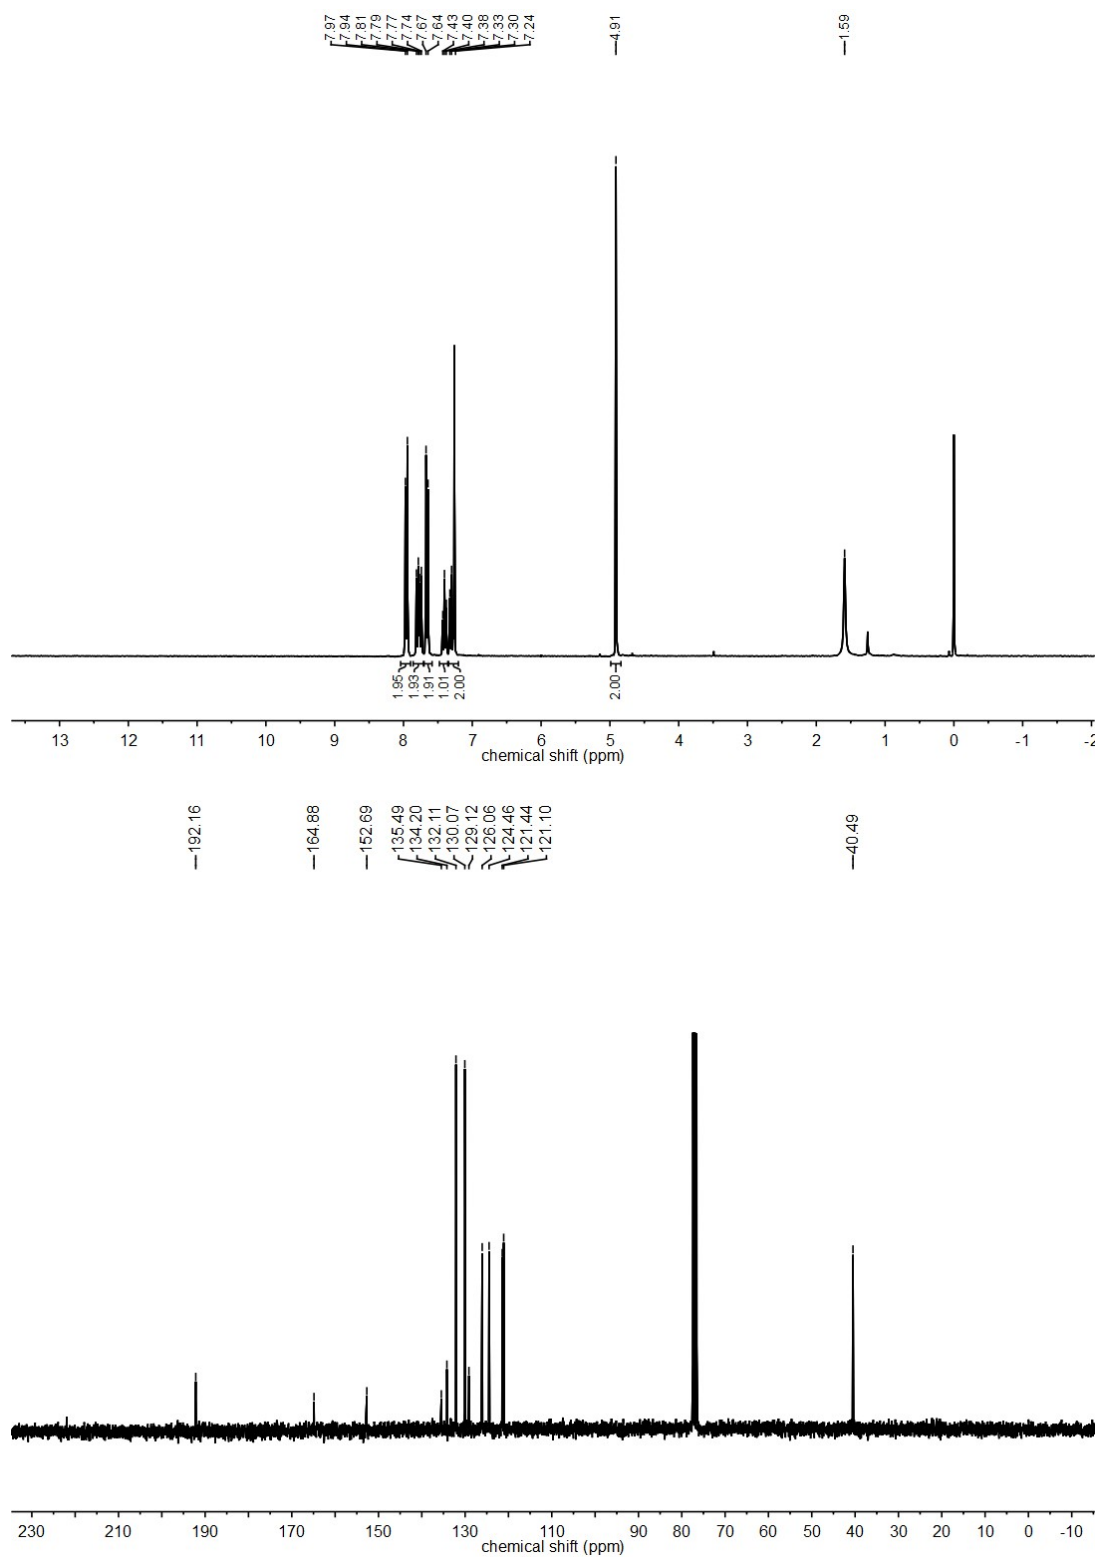

Figure S11. <sup>1</sup>H NMR and <sup>13</sup>C NMR spectrum of 2-(benzo[d]thiazol-2-ylthio)-1-p-tolyethanone

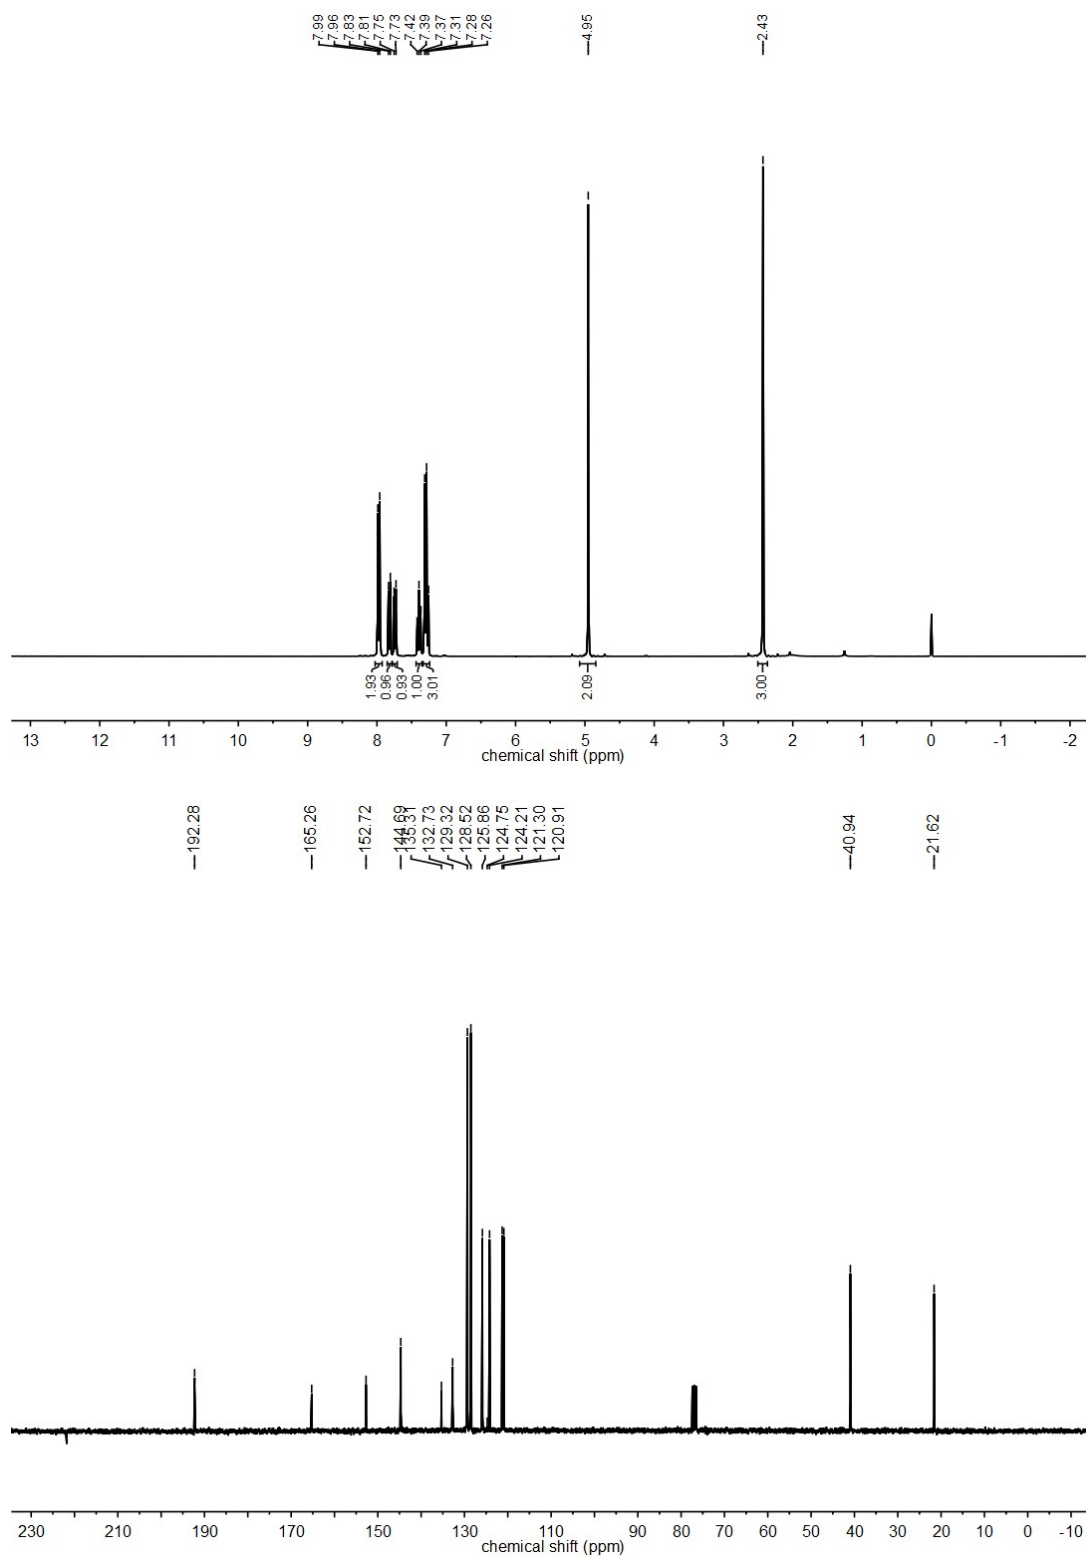



Figure S12. <sup>1</sup>H NMR and <sup>13</sup>C NMR spectrum of 2-(benzo[d]thiazol-2-ylthio)-1-(4-methoxyphenyl) ethenone

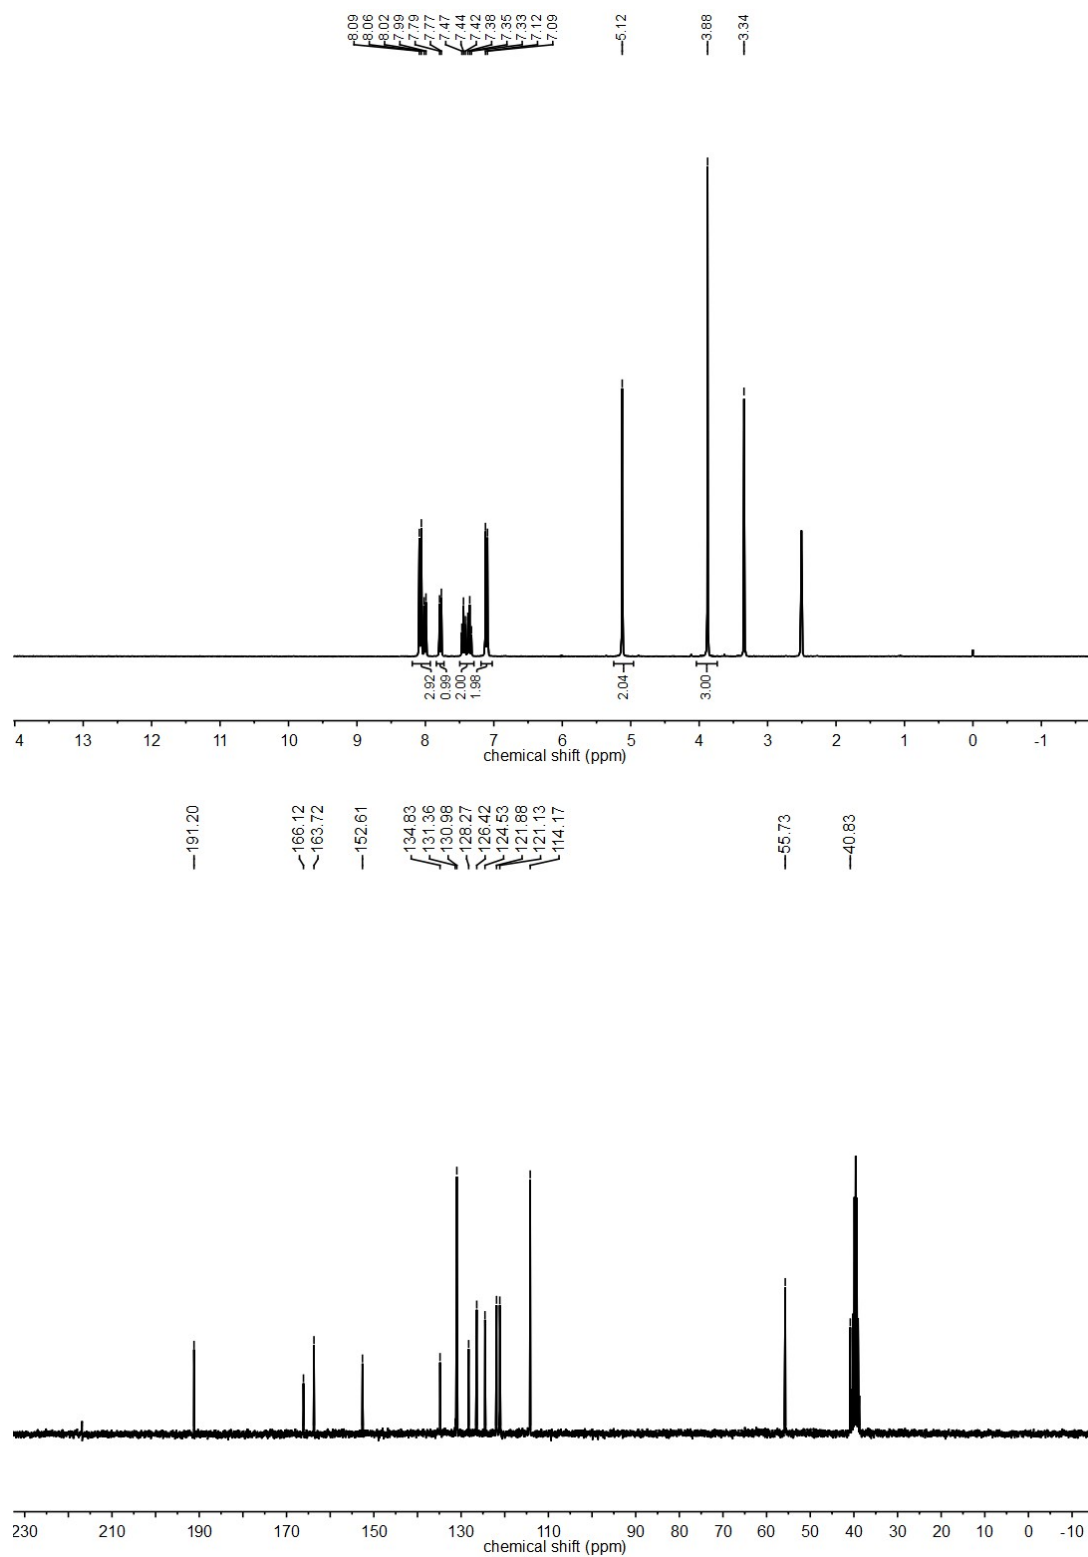

Figure S13. <sup>1</sup>H NMR and <sup>13</sup>C NMR spectrum of 1-([1,1'-biphenyl]-4-yl)-2-(benzo[d]thiazol-2-ylthio) ethenone

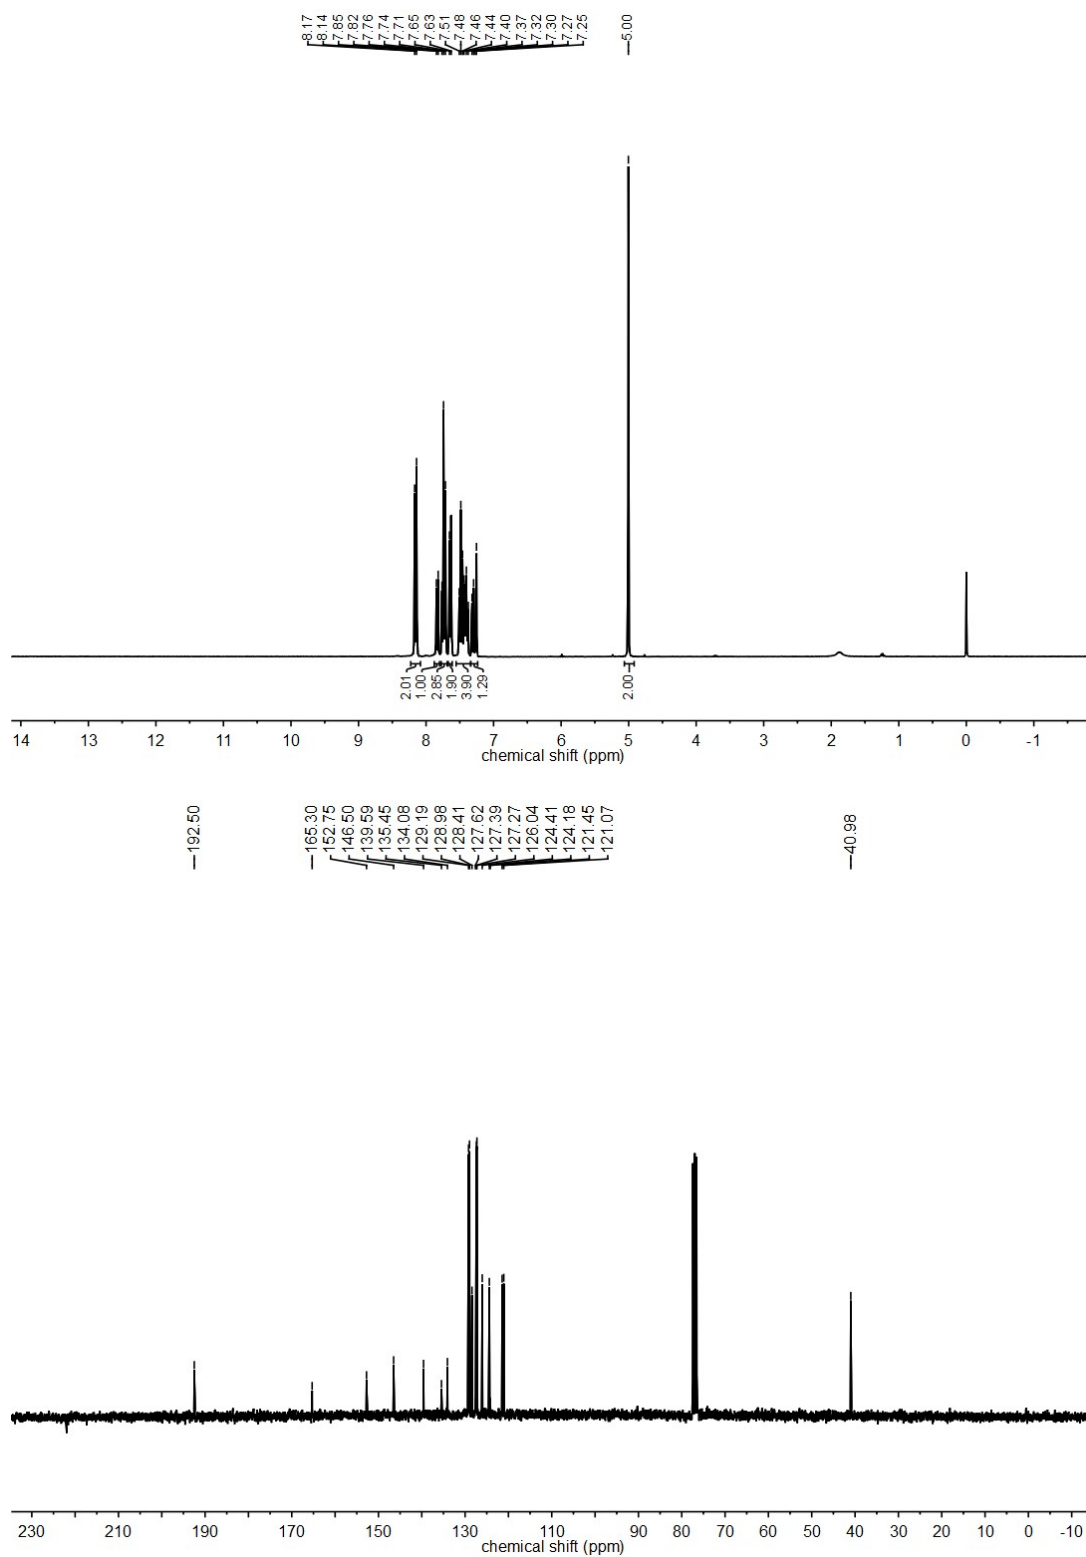

Figure S14. <sup>1</sup>H NMR and <sup>13</sup>C NMR spectrum of 2-(4-methylbenzo[d]thiazol-2-ylthio)-1-phenylethanone

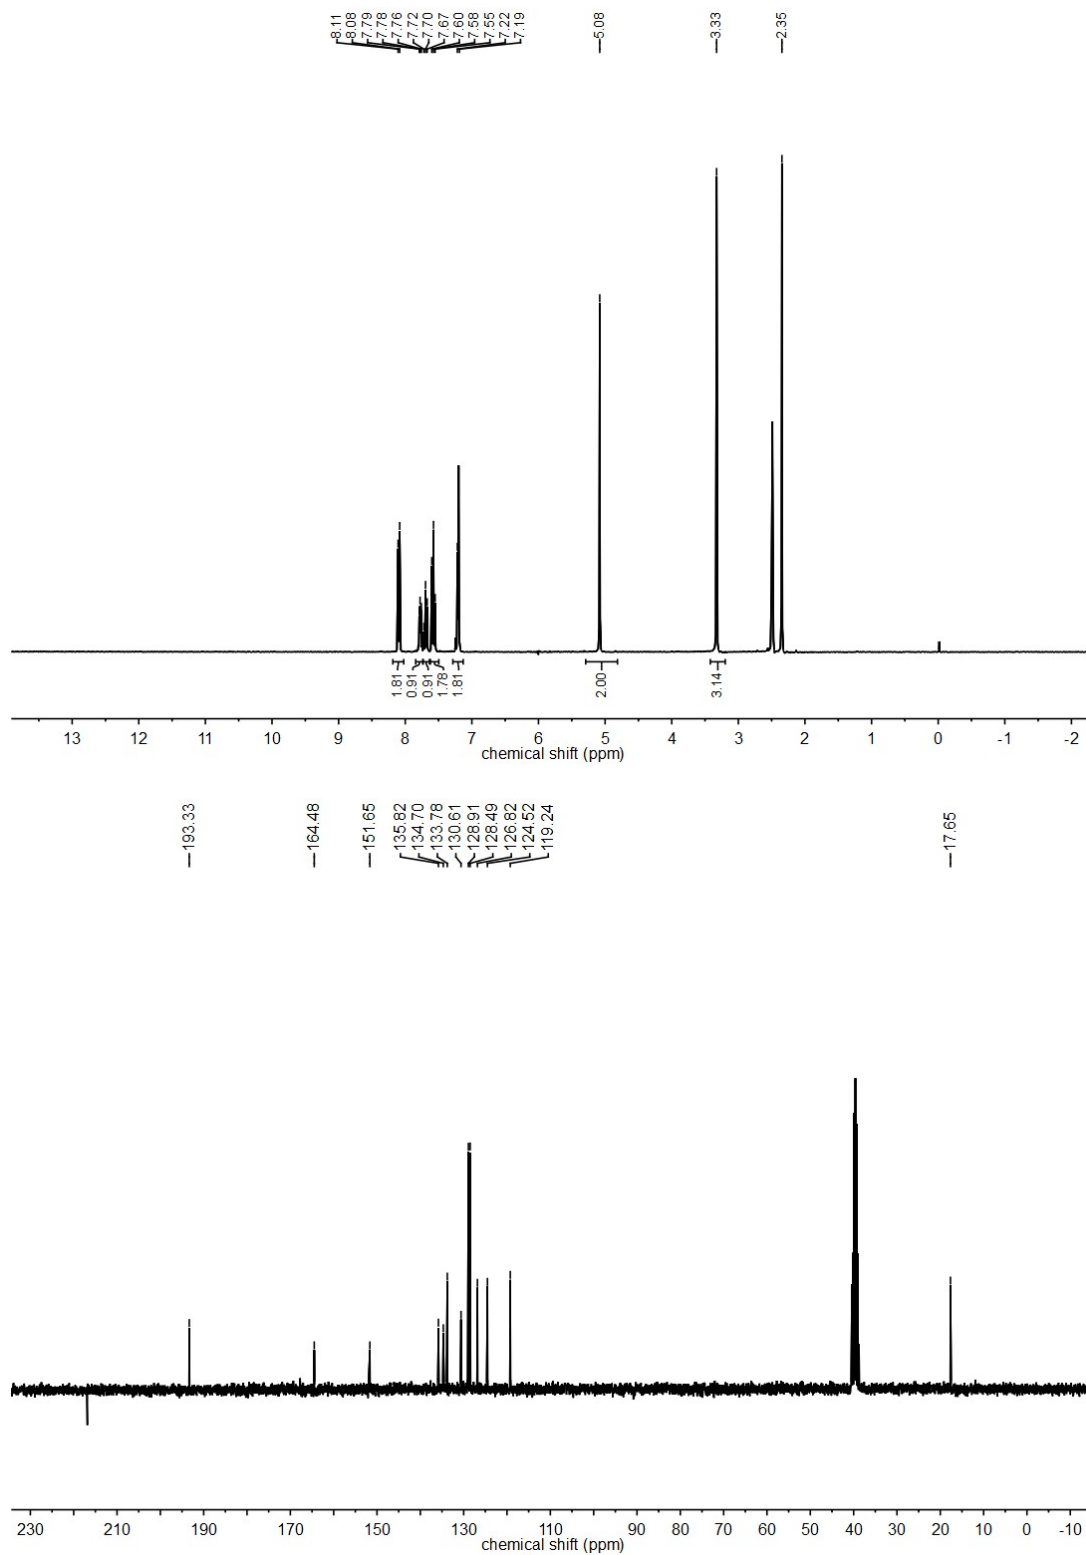

Figure S15. <sup>1</sup>H NMR and <sup>13</sup>C NMR spectrum of 2-(5-bromobenzo[d]thiazol-2-ylthio)-1-phenylethanone

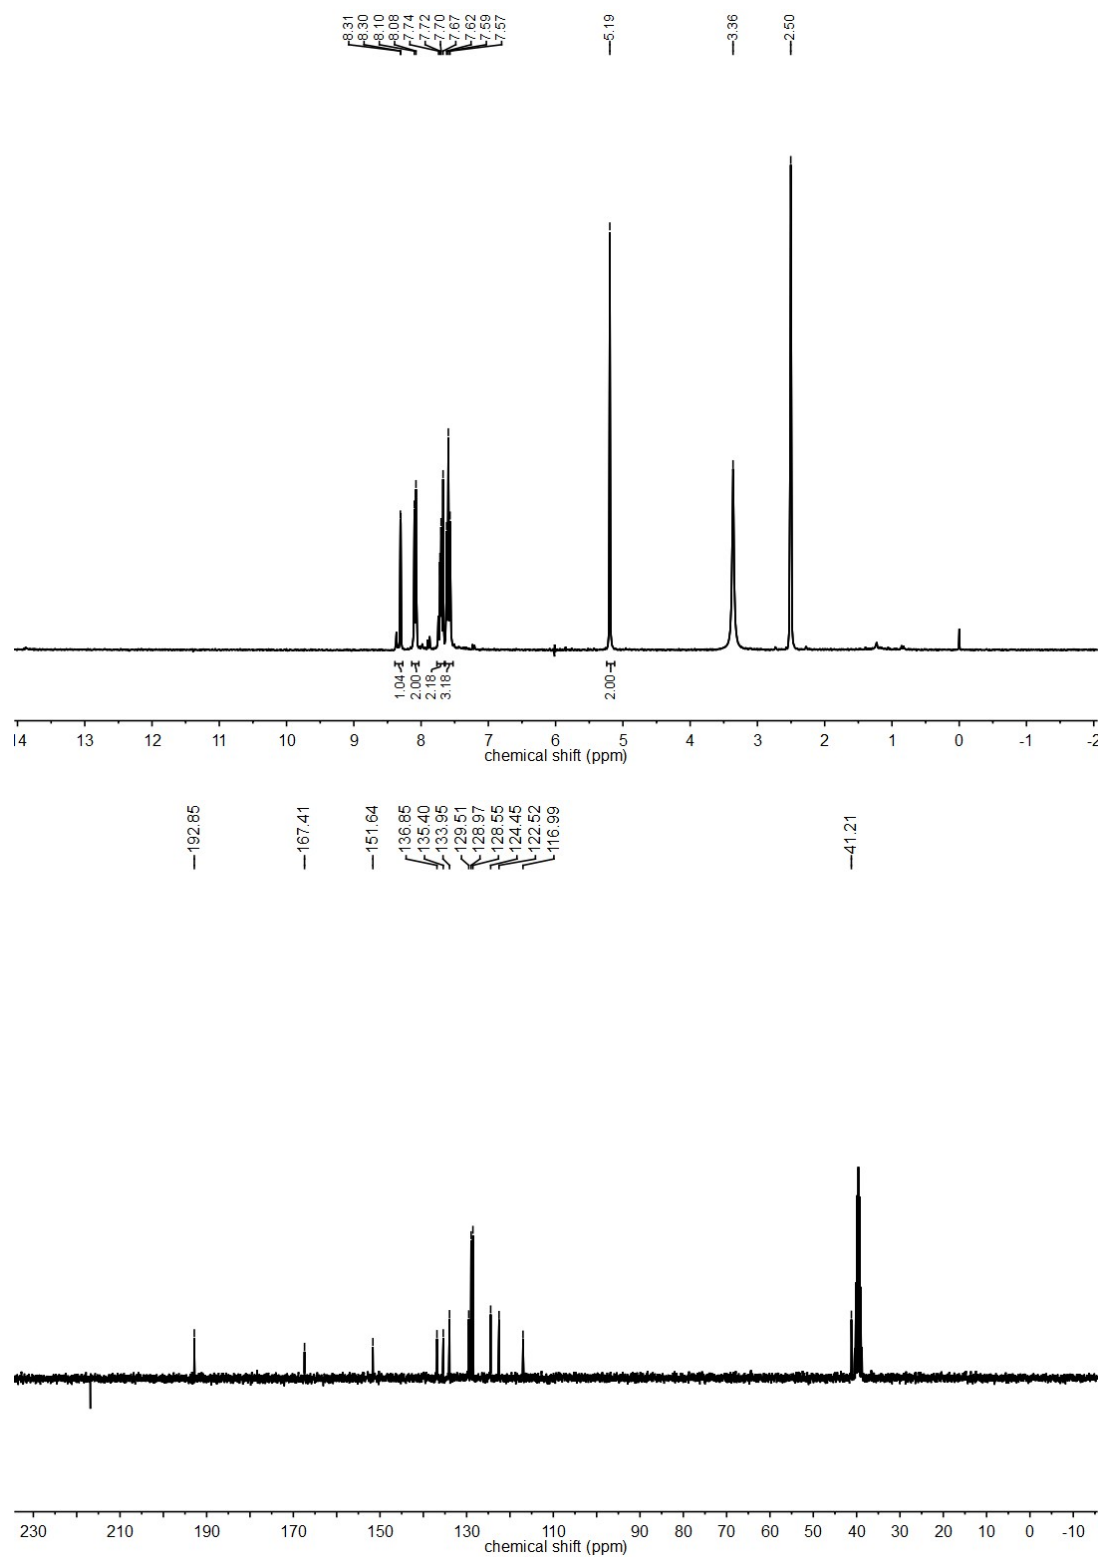

Figure S16. IR spectrum of  $[\text{H}_2\text{L}]\text{Br}_2$

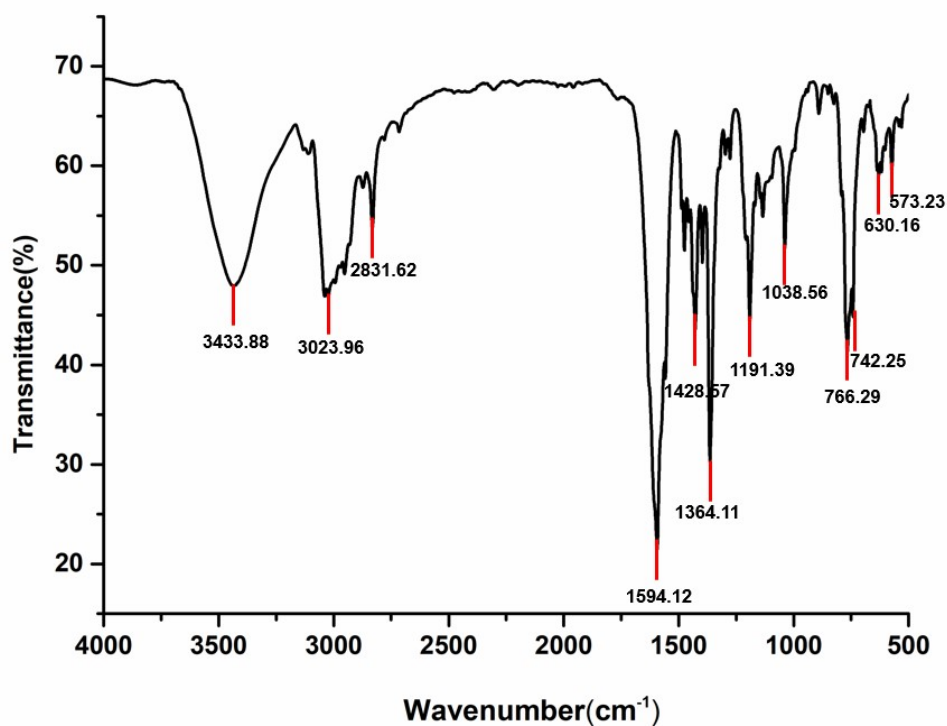

Figure S17. IR spectrum of  $[\text{H}_2\text{L}](\text{PF}_6)_2$

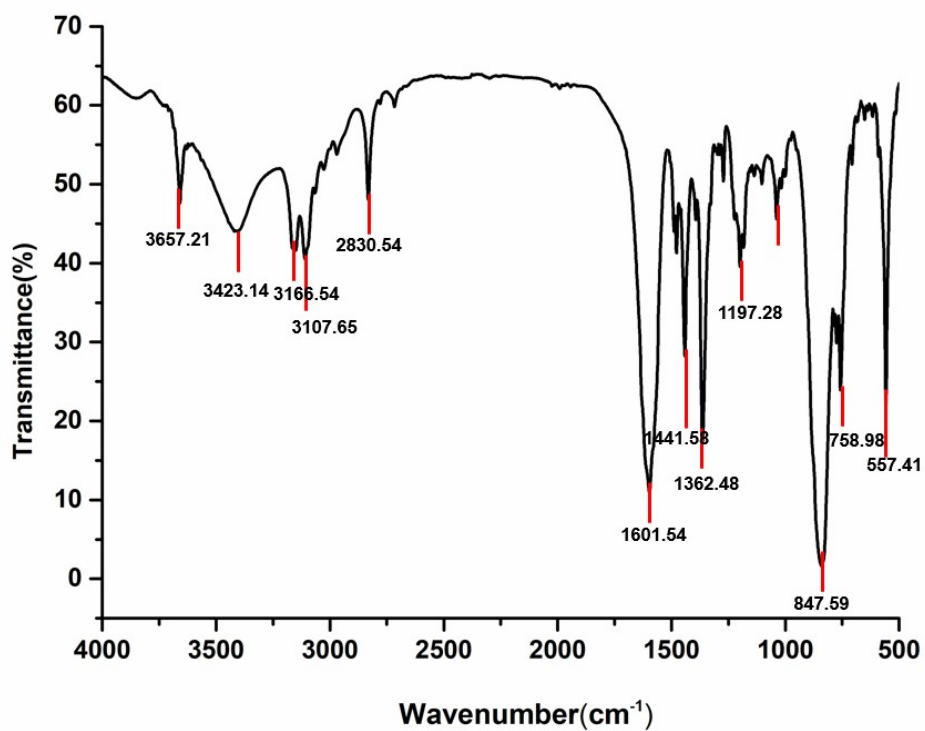

Figure S18. IR spectrum of  $[\text{NiL}]\text{Br}_2 \cdot \text{CH}_3\text{OH}$  (1)

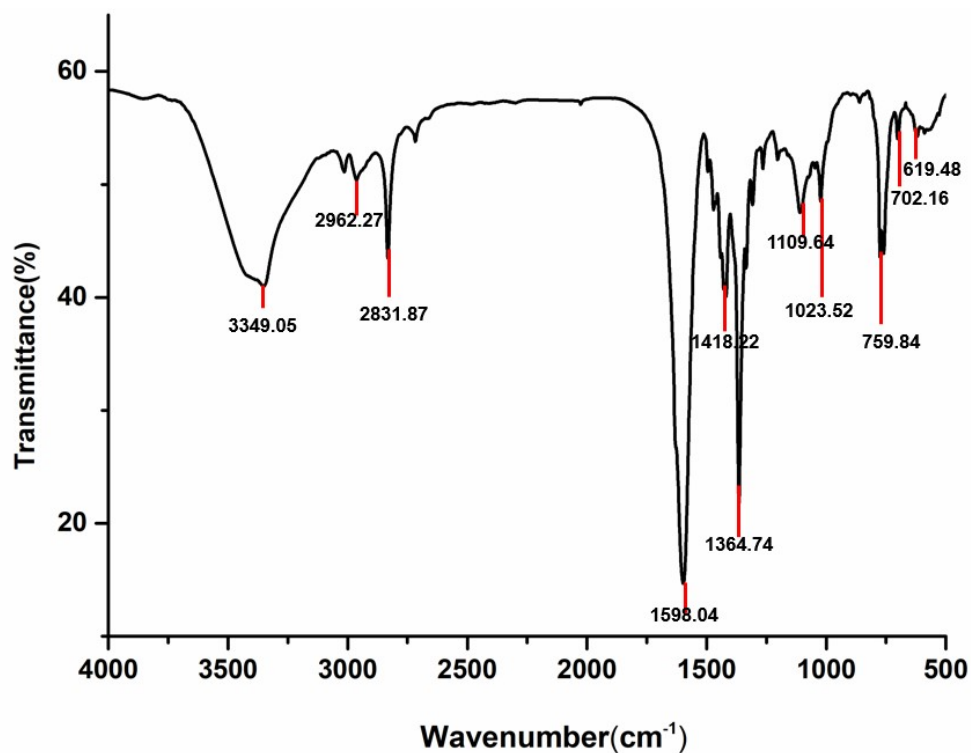

Figure S19. IR spectrum of  $[\text{NiL}](\text{PF}_6)_2 \cdot 0.5\text{CH}_3\text{CN}$  (2)

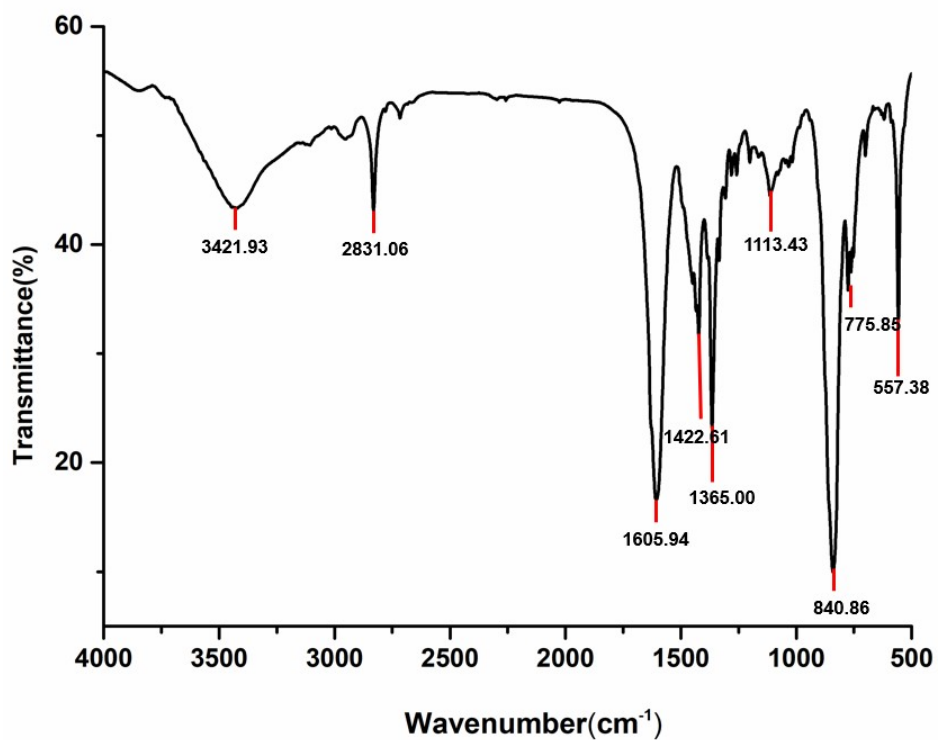

Figure S20. IR spectrum of [NiLBr]PF<sub>6</sub> (3)

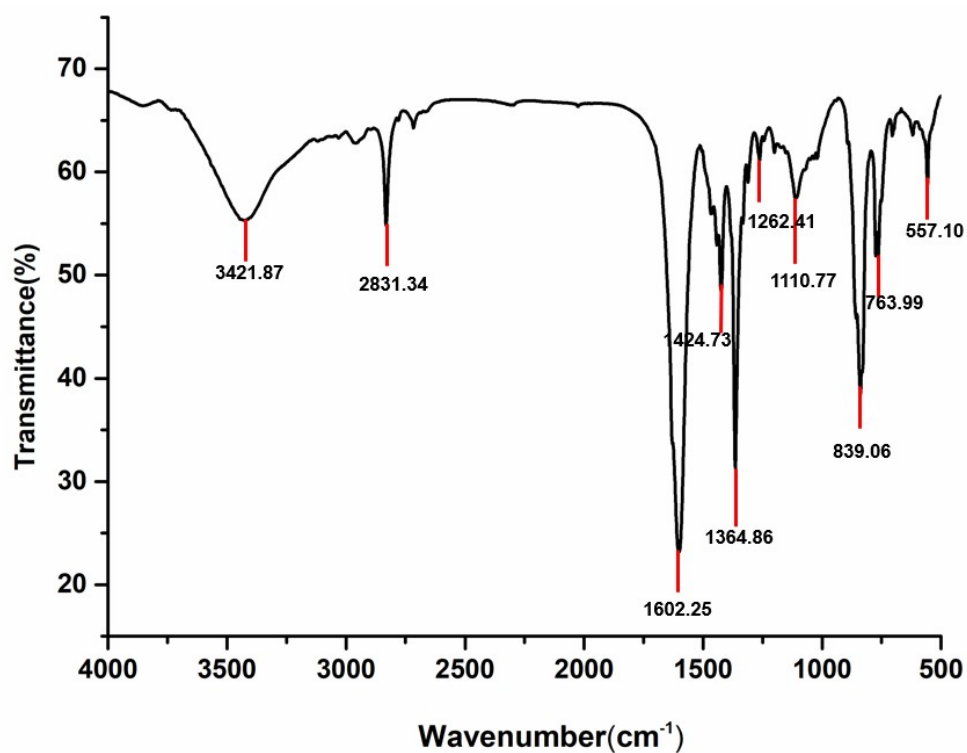

Figure S21. IR spectrum of 2-(benzo[d]thiazol-2-ylthio)-1-phenylethanone

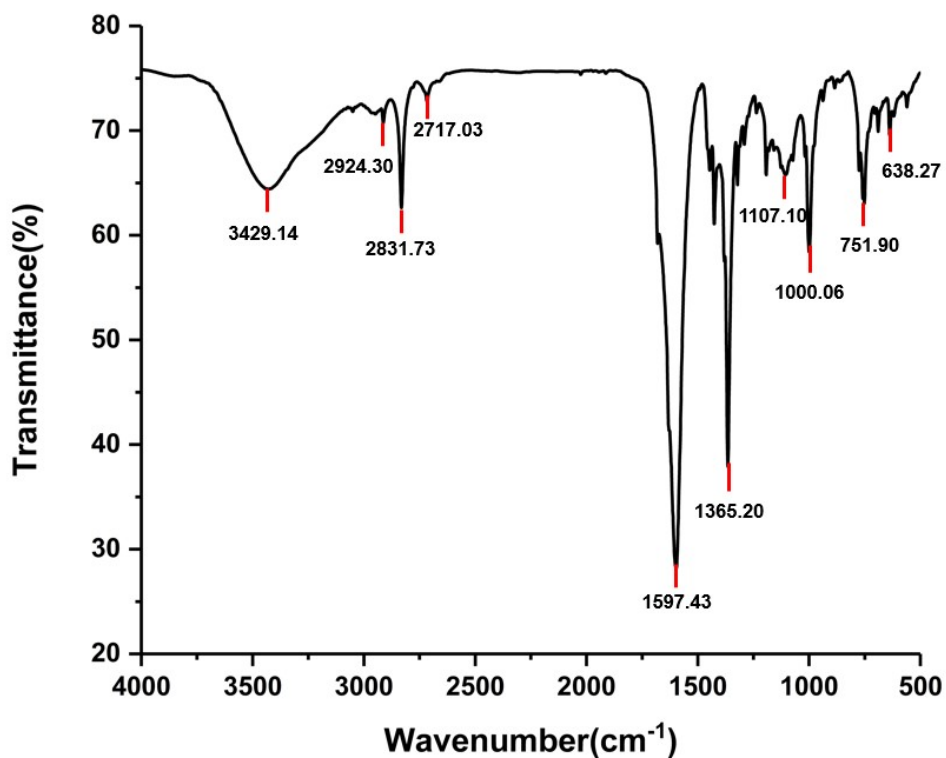

Figure S22. IR spectrum of 2-(benzo[d]thiazol-2-ylthio)-1-(4-fluorophenyl)ethenone

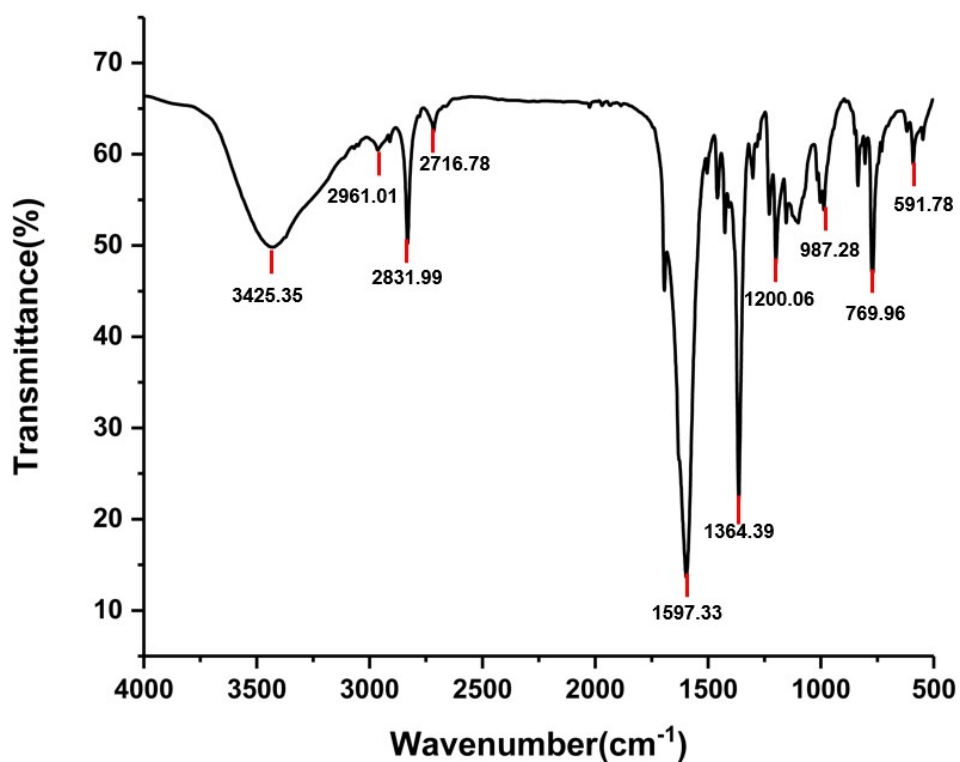

Figure S23. IR spectrum of 2-(benzo[d]thiazol-2-ylthio)-1-(4-chlorophenyl)ethenone

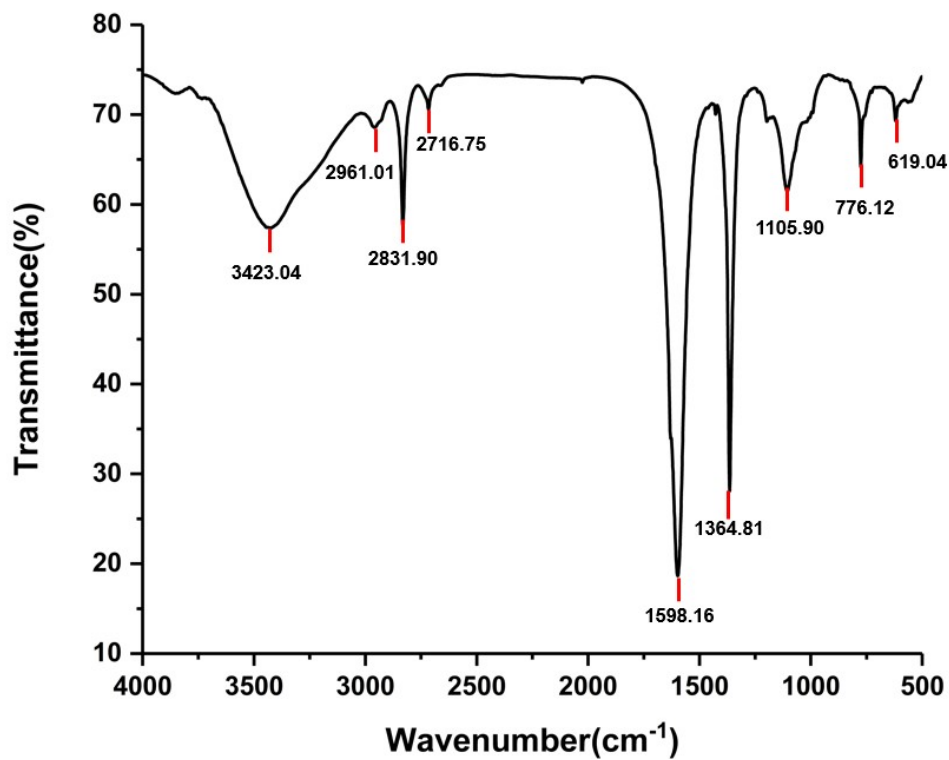



Figure S24. IR spectrum of 2-(benzo[d]thiazol-2-ylthio)-1-(4-bromophenyl)ethanone

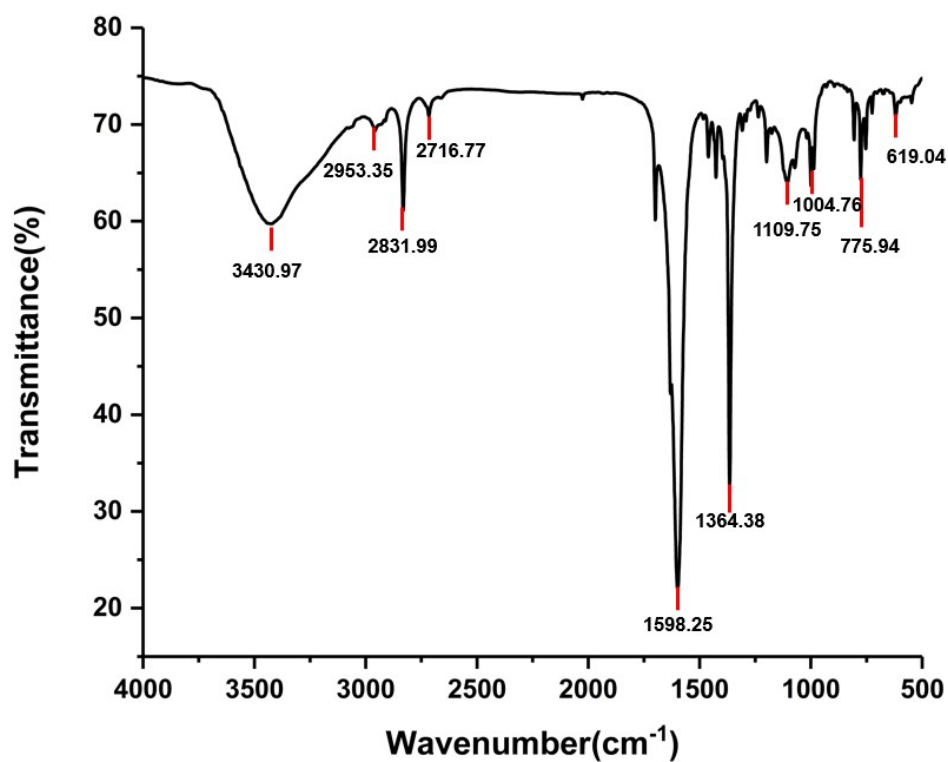

Figure S25. IR spectrum of 2-(benzo[d]thiazol-2-ylthio)-1-p-tolyethanone

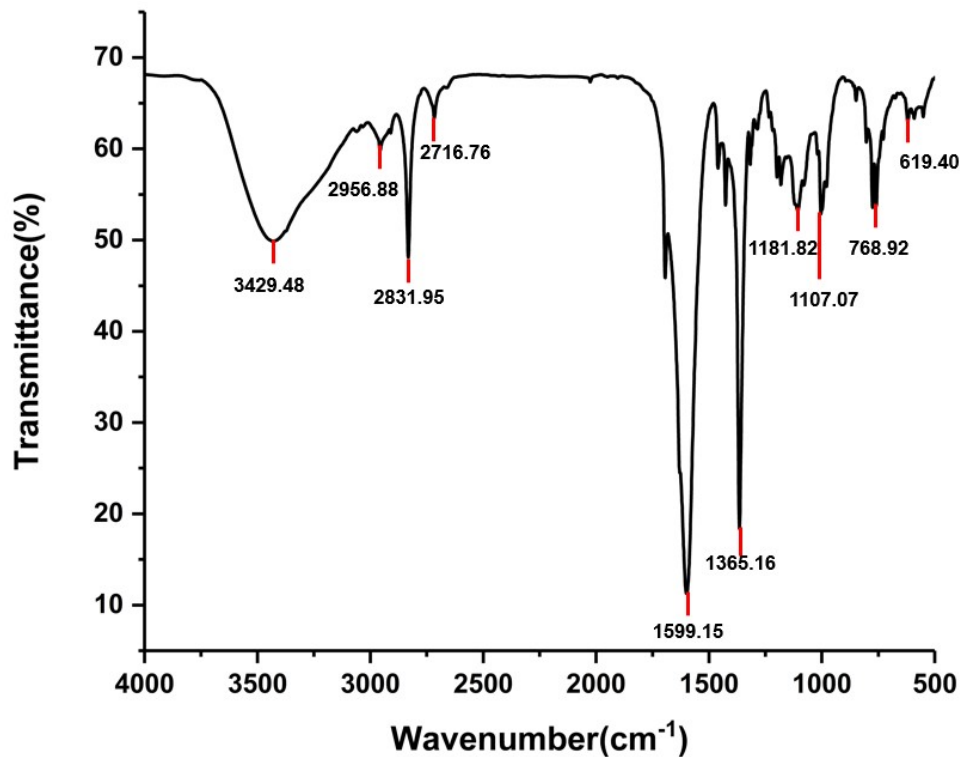

Figure S26. IR spectrum of 2-(benzo[d]thiazol-2-ylthio)-1-(4-methoxyphenyl)ethanone

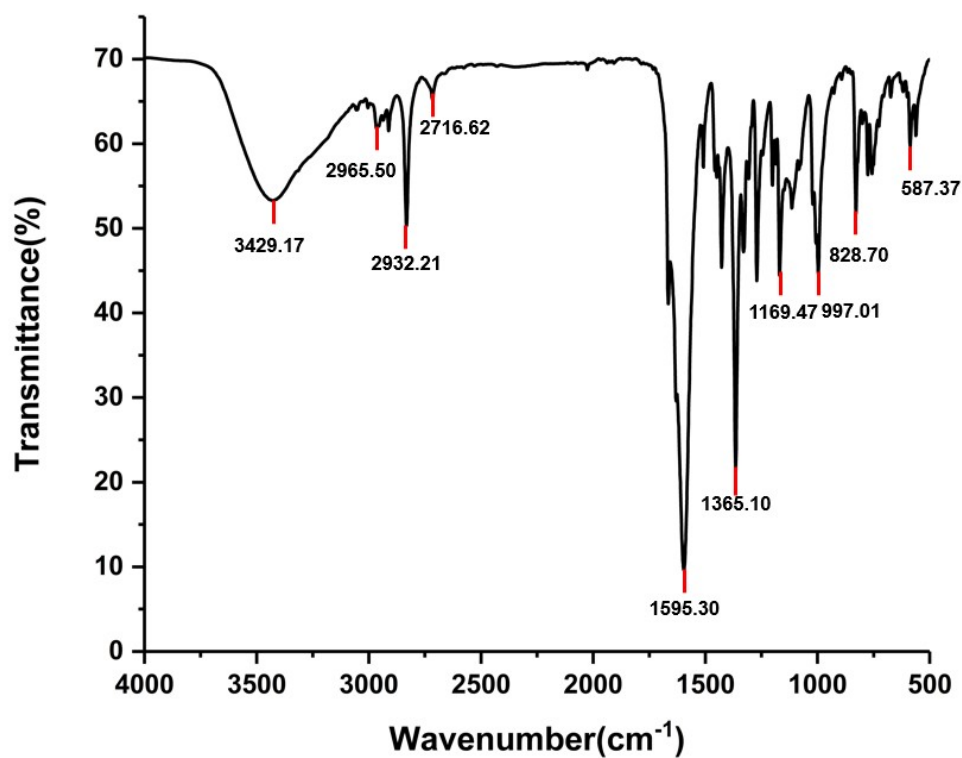

Figure S27. IR spectrum of 1-([1,1'-biphenyl]-4-yl)-2-(benzo[d]thiazol-2-ylthio)ethanone

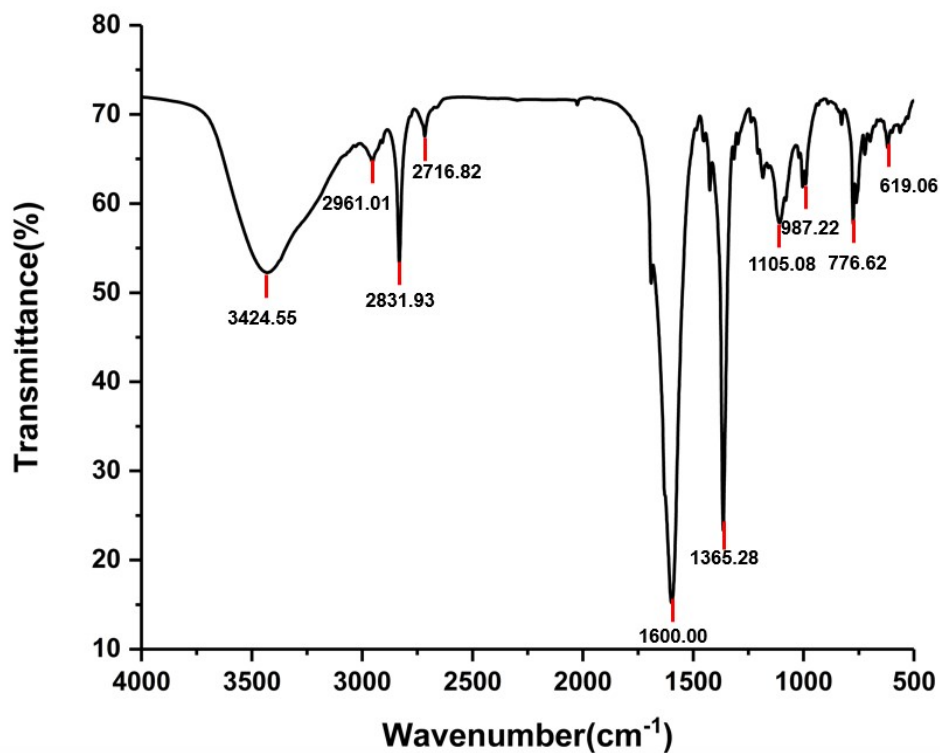

Figure S28. IR spectrum of 2-(4-methylbenzo[d]thiazol-2-ylthio)-1-phenylethanone

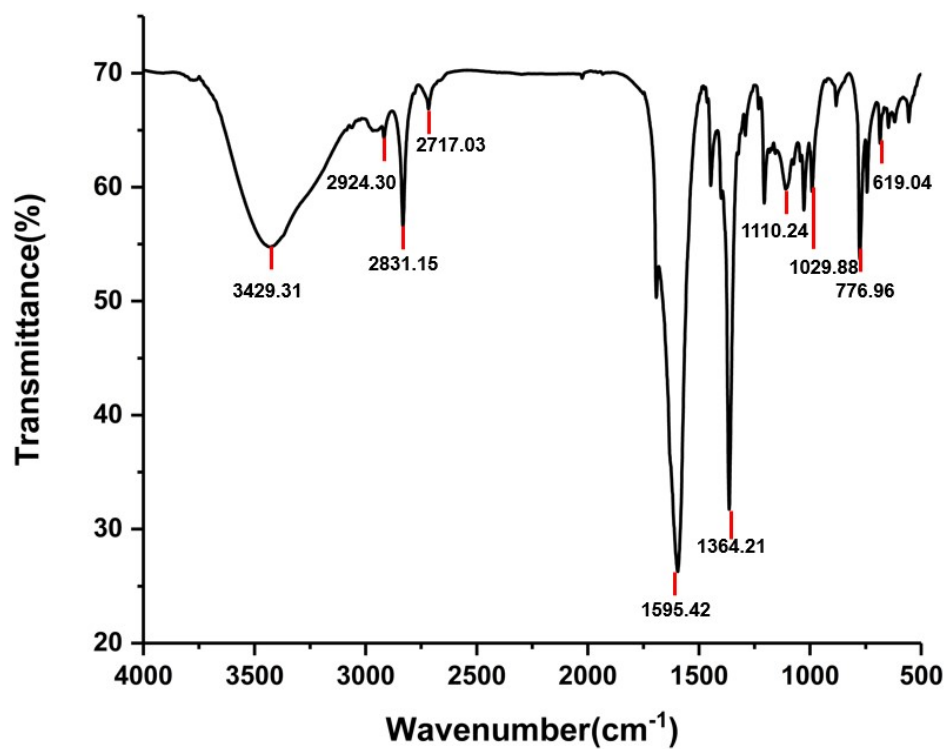

Figure S29. IR spectrum of 2-(5-bromobenzo[d]thiazol-2-ylthio)-1-phenylethanone

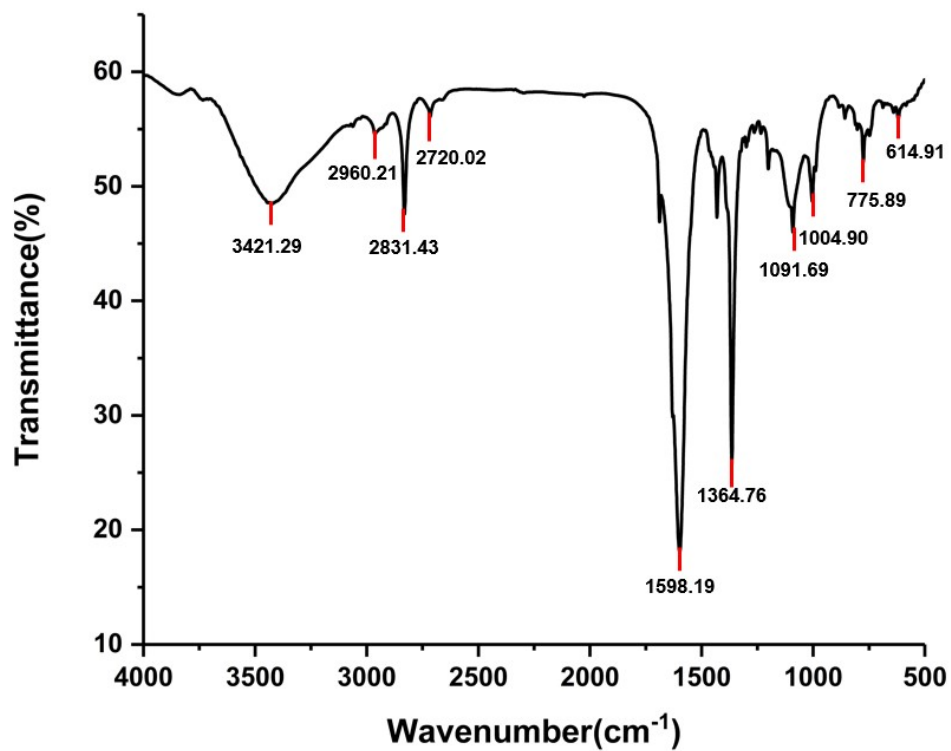

Supplement: d1dt03651c1.pdf [file d1dt03651c1.pdf]
